# **Different protein metabolic strategies for growth during food-induced physiological plasticity**

Aimee Ellison, Amara Pouv, and Douglas A. Pace<sup>1</sup>

Department of Biological Sciences, California State University Long Beach,  
Long Beach, CA. 90084

<sup>1</sup>Corresponding author, telephone: 562-985-4825 email: [douglas.pace@csulb.edu](mailto:douglas.pace@csulb.edu)

Running title: Protein metabolism and physiological plasticity

## Abstract

Food-induced morphological plasticity, a type of developmental plasticity, is a well-documented phenomenon in larvae of the echinoid echinoderm, *Dendraster excentricus*. A recent study in our lab has shown that this morphological plasticity is associated with significant physiological plasticity for growth. The goal of the current study was to measure several aspects of protein metabolism in larvae growing at different rates to understand the mechanistic basis for this physiological growth plasticity. Larvae of *D. excentricus* were fed rations of 1,000 (low-fed) or 10,000 (high-fed) algal cells mL<sup>-1</sup>. Primary measurements of protein growth, algal ingestion, aerobic metabolism, alanine transport and protein synthesis were used to model growth and protein metabolism. Relative protein growth rates were 6.0 and 12.2 % day<sup>-1</sup> for low- and high-fed larvae, respectively. The energetic cost of protein synthesis was similar between both treatments at 4.91 J (mg protein synthesized)<sup>-1</sup>. Larvae in both treatments used about 50% of their metabolic energy production to fuel protein synthesis. Mass-specific rates of protein synthesis were also similar. The most important difference between low- and high-fed larvae were mass-specific rates of protein degradation. Low-fed larvae had relatively low rates of degradation early in development that increased with larval age, surpassing high-fed degradation rates at 20 days post-fertilization. Changes in protein depositional efficiency during development were similar to those of larval growth efficiency, indicating that differences in protein metabolism are largely responsible for whole-organism growth plasticity. Mass-specific alanine transport rates were about 2-times higher in low-fed larvae, demonstrating that the longer arms of low-fed larvae may be a mechanism for acquiring more dissolved nutrients from their environment. In total, these results provide an explanation for the differences in growth efficiency between low- and high-fed larvae and demonstrate the importance of protein degradation pathways in establishing these growth differences. These observations, together with previous studies measuring morphological and physiological plastic responses, allow for a more integrated understanding of developmental plasticity in echinoid larvae.

Keywords: Developmental plasticity, Physiological plasticity, Protein metabolism, Larva, Physiology, Protein depositional efficiency, *Dendraster excentricus*

Abbreviations: DPF, days post-fertilization; PO, postoral arm; AE, assimilation efficiency; GGE, gross growth efficiency; NGE, net growth efficiency; PGE, protein growth efficiency; PDE, protein depositional efficiency; MBL, midline body length; FAA, free amino acid pool; RGR, relative growth rate; BCA, bicinchoninic assay; BSA, bovine serum albumin; TCA, trichloroacetic acid; BOD, biological oxygen demand; TOR, target of rapamycin; DOM, dissolved organic material

## 1 Introduction

2           The earliest stages of an organism's life are typically characterized by both rapid  
3 development and growth. The timing, rates, and efficiencies of these processes can have  
4 important ramifications for the remainder of the organism's life. This is especially important for  
5 marine ectotherms, whose development and growth are sensitive to many different  
6 environmental parameters. Therefore, it is critical to gain a foundational understanding of the  
7 molecular, biochemical, physiological, and morphological pathways and strategies that are  
8 utilized during these unique moments where rates of growth and development are high, relative  
9 to later stages in life. Such an understanding is critical to predicting organismal responses in the  
10 face of rapid environmental changes, many the result of anthropogenic activities.

11           Increase in biomass during early development, through the creation of new tissues as  
12 well as increases in biochemical reserves, occurs through accumulation of three primary  
13 biochemical substrates: proteins, lipids, and carbohydrates. While there is interspecific  
14 variability in the importance of each, it is generally observed that proteins are the most important  
15 of these biomass constituents (Fraser and Rogers, 2007). Proteins comprise the majority of an  
16 organism's biomass and they serve as developmental and metabolic regulators because of their  
17 role as enzymes. Proteins are considered the most expensive molecules to synthesize  
18 (Hawkins, 1991; Houlihan, 1991; Berg et al., 2012), with each addition of an amino acid to a  
19 polypeptide chain costing, at a theoretical minimum, 4 ATP equivalents (Berg et al., 2012). Total  
20 costs of protein synthesis are likely much higher due to the additional costs of supporting  
21 processes such as amino acid transport, RNA synthesis, and protein trafficking. Proteins also  
22 undergo relatively high rates of turnover in which they are degraded and resynthesized, adding  
23 another substantial energetic cost due to the ATP-dependent nature of ubiquitin targeting and  
24 proteasomal degradation (reviewed in Finley, 2009). These processes are collectively classified  
25 as protein metabolism. A critical question that emerges from studies of protein metabolism and  
26 growth is whether protein growth is achieved primarily through increased synthesis rates, or by  
27 decreased degradation rates (Fraser and Rogers, 2007). Another important question is if protein  
28 growth rates can be enhanced by manipulating the efficiency of protein metabolism. For  
29 example, increased rates of protein growth could theoretically be supported by increasing  
30 protein depositional efficiency and/or decreasing the energetic cost of protein synthesis.

31           Much research examining growth and development during early life stages has focused  
32 on planktotrophic (feeding) marine invertebrate larvae. This is especially true for the larvae of  
33 echinoid echinoderms, where there is a relative wealth of information concerning rates of

1 morphological growth and development and their sensitivity to critical environmental parameters  
2 (e.g., McEdward, 1984; Hart and Strathmann, 1994; Bertram and Strathmann, 1998; Reitzel et  
3 al., 2004; Byrne et al., 2008; Pan et al., 2015; Rendleman and Pace, 2018). In addition, several  
4 studies have assessed the biochemical and metabolic importance of protein metabolism during  
5 echinoid development (Marsh et al., 2001; Pace and Manahan, 2006, 2007a; Pan et al., 2015;  
6 Pan et al., 2018). These studies have clearly demonstrated that regulation of protein  
7 metabolism is a critical feature in determining organismal rates of growth and as well as an  
8 important response mechanism to environmental changes.

9 Echinoid larvae exhibit food-induced phenotypic plasticity (e.g., Hart and Strathmann,  
10 1994; Miner and Vonesh, 2004; Soars et al., 2009; Adams et al., 2011). From a morphological  
11 perspective, the pluteus larva responds to different levels of unicellular algal food by changing  
12 the length of their larval arms (ciliated projections that create a feeding current that allows for  
13 the capture and ingestion of algal food) such that low-fed larvae grow longer arms to increase  
14 their feeding ability while high fed larvae grow shorter arms and allocate resources towards  
15 faster growth (Strathmann et al., 1992; Miner, 2011). This response allows high-fed larvae to  
16 attain metamorphic competency sooner, thereby reducing their time in the plankton and its  
17 associated dangers (Rumrill, 1990). It has recently been demonstrated that in conjunction with  
18 this morphological plasticity there is also significant physiological plasticity (Rendleman et al.,  
19 2018). Low-fed larvae of the echinoid *Dendraster excentricus* (Eschscholtz, 1831) have  
20 relatively (compared to high-fed larvae) high digestive efficiency that complements their  
21 increased feeding ability. This high digestive efficiency is accompanied by similarly high growth  
22 efficiencies, including protein growth efficiency (the amount of protein biomass growth relative to  
23 the amount of protein ingested). While these high efficiencies quickly diminish over development  
24 and are rapidly surpassed by high-fed larval efficiencies, they are clearly beneficial and allow  
25 the morphological and physiological plasticity responses to operate in tandem to allow the  
26 larvae to make the most of their limited food environment. While there have been no direct  
27 measurements of protein metabolism with regards to this plasticity response, some studies have  
28 indirectly provided support of differences in protein metabolism by way of thyroxine signaling  
29 (Heyland and Hodin, 2004) and target of rapamycin (TOR) signaling (Carrier et al., 2015).

30 The goal of the current study was to directly quantify components of protein metabolism  
31 – protein growth, synthesis, degradation, depositional efficiency, and energetic costs – in larvae  
32 of *D. excentricus* during food-induced plasticity to understand their potential roles in establishing  
33 the large differences in growth efficiency between low- and high-fed larvae. We discovered that

1 mass-specific rates of protein synthesis, as well as costs of protein synthesis, were similar in  
2 low- and high-fed larvae. The most significant difference was in protein depositional efficiency  
3 (amount of synthesized protein retained as biomass), indicating that differential rates of protein  
4 degradation provide the mechanism by which different rates of protein growth were achieved  
5 between low- and high-fed larvae. Our results provide a physiological mechanism to explain the  
6 previously observed differences in protein growth efficiency (Rendleman et al., 2018) resulting  
7 from physiological plasticity.

8

## 1 **METHODS**

### 2 ***Sand Dollar Collection, Spawning, and Larval Culturing***

3 *Dendraster excentricus* (Eschscholtz, 1831) adults were collected from Los Angeles  
4 Harbor in San Pedro, CA (33.7088, -118.2806). Animals were kept in large coolers during  
5 transport to the California State University, Long Beach (CSULB) Marine Laboratory. The  
6 collected sand dollars were kept in 200L tanks of flowing seawater at about 16°C for no longer  
7 than 3 days before being used for experiments. Coelomic injections of 0.5 mol L<sup>-1</sup> KCl were  
8 used to induce gamete release. Sperm were diluted (1:1000) and gently mixed with eggs in  
9 sterile-filtered seawater (0.2 µm pore) until achieving a sperm to egg ratio of ~ 5:1. Fertilization  
10 envelopes were counted to confirm successful fertilization (>90%). All cultures were reared at  
11 16 (±1)°C in the CSULB marine laboratory. For each culture, eggs and sperm from 3 females  
12 and 3 males were combined for fertilization. Embryos were reared at 5 individuals mL<sup>-1</sup> in 20-L  
13 food-grade vessels (Cambro, Huntington Beach, CA). Cultures were gently mixed using a  
14 motor-driven plastic paddle (Buehler Products, NC) at 6 rpm. Experimental results (unless  
15 otherwise noted) were derived from 3 independent cultures that were initiated during July 2017  
16 (Culture 1), February 2018 (Culture 2), and July 2018 (Culture 3).

17 After reaching the feeding larval stage, animals were divided equally between low- and  
18 high-fed treatments. Larvae were fed *Rhodomonas* sp., an algae commonly used to rear  
19 echinoid larvae due to its ability to support robust growth and development in a laboratory  
20 setting (e.g., Strathmann, 1971; Schioppa et al., 2006; Rendleman et al., 2018). Low- and high-  
21 fed rations were fed 1,000 and 10,000 algal cells mL<sup>-1</sup>, respectively. Previous research  
22 (Rendleman et al., 2018) has demonstrated that these culture conditions result in the  
23 expression of both morphological and physiological plasticity and thus are appropriate for our  
24 analysis. Algae were cultured in Erlenmeyer flasks with sponge stoppers and grown using f/2  
25 media. Algal cultures were always harvested for larval feeding at the end of their logarithmic  
26 growth phase. To minimize the potential for microbial growth and other non-specific effects  
27 related to algal nutrient media, all media was removed from algae by centrifugation (Beckman  
28 Coulter Avanti J-E : 3,000 rpm, 12 minutes, 10°C) and algae were resuspended in fresh  
29 seawater before counting and addition to larval cultures. Algal concentrations were determined  
30 using a BD Accuri C6 (BD Biosciences, San Jose, CA) flow cytometer following established  
31 methods (Cucci et al., 1989; Lizárraga et al., 2017; Rendleman et al., 2018). Algal cells were  
32 identified by chlorophyll autofluorescence stimulated by a blue laser (488 nm) and detected after  
33 passage through a 585/40 nm filter. Gating parameters and the accuracy of flow cytometer

1 counts were established and checked using serial dilution assays of *Rhodomonas* sp. and  
2 comparison against hemocytometer counts. Algal concentrations in each larval culture were  
3 checked daily and restocked to the target feeding concentration to ensure consistent feeding  
4 conditions. High-fed larval cultures were terminated at 25 days post-fertilization (DPF) due to a  
5 large proportion of larvae metamorphosing in the culture vessels. Low-fed larval cultures were  
6 studied until 42 DPF at which point there were not enough larvae to continue the analysis.  
7 Instantaneous mortality rates ( $m$ ) of all cultures were determined using the equation  $N_t = N_0 e^{-tm}$   
8 (Rumrill, 1990), where  $N_0$  is the number of larvae at 3 DPF,  $N_t$  is the number of larvae remaining  
9 at 23 DPF (a common range for both feeding treatments was used), and  $t$  is the total time, 20  
10 days.

11

### 12 **Larval Morphometrics**

13 The occurrence of morphological plasticity was confirmed by linear measurements of  
14 low- and high-fed larvae. Because it has been demonstrated that the feeding conditions used  
15 here result in morphological plasticity, the current study only examined one of the cultures  
16 (Culture 3) as a confirmation. Post oral (PO) arm length and mid-line body length (MBL) were  
17 measured as described in Rendleman et al. (2018). Measurements were made on 3, 5, 7, 10,  
18 12, 15, and 20 DPF. Ten larvae from each treatment were removed and photographed using a  
19 QIClick digital camera mounted on an Olympus BX51 compound microscope. Lengths were  
20 then determined using Image J software calibrated using an image of a stage micrometer.

21

### 22 **Protein biomass growth**

23 Throughout larval development, triplicate samples of 500 larvae were taken for  
24 measuring protein biomass. Larval concentration was estimated using a Sedgewick Rafter  
25 counting chamber. Samples of known concentration were placed in Eppendorf 1.5 mL micro  
26 centrifuge tubes. Samples were spun at 1,000g (4C) for 2 minutes and excess seawater was  
27 removed by aspiration. Samples were then stored at -80°C until protein biomass was analyzed  
28 (within 4 weeks of sample being taken). Protein biomass was determined using a BCA Protein  
29 Assay Kit (ThermoFisher, MA). Previously frozen larval samples were removed from -80°C  
30 storage and resuspended in 500  $\mu$ l of NANOpure (Barnstead) water and sonicated (30%  
31 amplitude, 3 pulses at 2 seconds each while on ice). Three aliquots of each preparation  
32 (technical replicates) were run for protein content following manufacturer's instructions. For all  
33 determinations of protein content, known absolute amounts of Bovine Serum Albumin (BSA)  
34 were used to construct a standard curve for quantification of protein content from

1 spectrophotometric absorption values (562nm). Protein biomass values were used to quantify  
2 biomass growth rates as well as to standardize physiological rates to biomass (e.g., respiration,  
3 amino acid transport, and protein synthesis rates). Relative growth rates (RGR, % protein mass  
4 day<sup>-1</sup>) were calculated using the following equation from Conceição et al. (1998):

5 
$$RGR = (e^g - 1) \times 100, \text{ where: } g = \frac{\ln protein_2 - \ln protein_1}{T_2 - T_1}$$

6 Where  $e$  is 2.718 (inverse of the natural log),  $T_1$  and  $T_2$  are the developmental timepoints where  
7 protein biomass samples were taken and  $protein_1$  and  $protein_2$  are the protein biomass values  
8 (in ng individual<sup>-1</sup>) for the respective time-points. The RGR was calculated for every interval in  
9 which protein values were taken, resulting in 6 estimates per culture for low-fed larvae and 4-5  
10 estimates per culture for high-fed larvae.

### 11 **Ingestion Rates**

12 Daily algal ingestion rates were measured in all 3 cultures as described in Rendleman et  
13 al. (2018). Algal concentrations were determined by measuring the decrease in algal  
14 concentration ~24 hours after restocking each larval culture vessel to its target concentration.  
15 Algal concentrations in vessels were determined using a BD Accuri™ C6 flow cytometer. Three  
16 algal samples (75 µl each) were removed from each culture vessel using a 50 µm-pore Nitex  
17 mesh to ensure no larvae entered the sample. The volume of sample necessary to count  
18 100,000 cells was recorded. Three control vessels (3 L each, being mixed with similarly  
19 proportioned paddles driven by small Beuhler motors) containing only algae were used to  
20 correct for any changes in algal concentration not attributed to larval feeding. Daily estimation  
21 also ensured that despite differences in feeding rates, low- and high-fed larvae were always  
22 restocked to their target algal concentrations. The following equation was used for ingestion rate  
23 determination:

24 
$$IR = \frac{[(C_i - C_f)_{Exp} - (C_i - C_f)_{Control}] \times Volume}{Time \times Larvae}$$

25 where IR = ingestion rate in the units of algal cells larva<sup>-1</sup> day<sup>-1</sup>. Exp and Control represent  
26 concentrations for the experimental (vessels containing algae and larvae) and control (vessels  
27 only containing algae) culture vessels, respectively.  $C_i$  and  $C_f$  represent initial and final algal  
28 concentration for the experimental and control vessels in the units of algal cells mL<sup>-1</sup>. Volume  
29 equals the volume of the culture vessels in the units of mL. Time is the duration between the  
30 initial and final algal concentration measurements (typically between 20 to 24 hours) and larvae



1 is the number of larvae in the experimental vessel for which ingestion rates were being  
2 estimated. The concentration of larvae in the vessels was determined 3 times per week (during  
3 water changes using a Sedgewick Rafter counting chamber) and used with culture volume to  
4 estimate larval numbers. For IR determinations on a non-water change day, larval number was  
5 estimated by interpolating from larval estimates preceding and succeeding that measurement.  
6 These IR values were then used to directly determine the amount of energy ingested through  
7 algal feeding and subsequently used to support measured physiological rates (e.g., growth,  
8 respiration, protein synthesis). Because there were instances when larvae ate most of the food  
9 provided within the 24-hour interval (especially later in development), these estimates are not  
10 reflective of their feeding capacity.

11

## 12 ***Respiration Rates***

13 Larval respiration rates were determined in all 3 cultures as described in Rendleman et  
14 al. (2018), using the  $\mu$ BOD method (Marsh and Manahan, 1999). Sterile filtered, oxygen  
15 saturated seawater was placed in 11 custom-made  $\mu$ BOD vials (volume  $\sim 800\mu\text{l}$ ) and a range of  
16 larvae (50-600 individuals, depending on developmental stage) were micro-pipetted into eight  
17  $\mu$ BOD vials. The additional three vials contained only filtered seawater and served as blanks to  
18 account for non-larval consumption of  $\text{O}_2$  (e.g., microbial respiration). The vials were then  
19 incubated at  $16^\circ\text{C}$  for three hours, after which time, the oxygen content was measured using a  
20 polarographic oxygen sensor (Strathkelvin Instruments, Scotland). Vials were spun down and  
21 approximately  $400\ \mu\text{l}$  of seawater were removed with a gas tight syringe and injected into the  
22 oxygen sensor chamber (volume  $\sim 70\mu\text{l}$ ). After one minute, the time and oxygen concentration  
23 were recorded. The number of larvae in each vial were counted for each treatment and oxygen  
24 consumption ( $\text{pmoles O}_2\ \text{hr}^{-1}$ ) was linearly regressed against the number of individuals in each  
25 vial to determine  $\text{pmole O}_2\ \text{hr}^{-1}\ \text{individual}^{-1}$ . For all respiration rates recorded, no evidence of  
26 concentration-dependent artifacts were observed (i.e., total  $\text{O}_2$  consumed increased linearly with  
27 increasing larvae in each  $\mu$ BOD).

28

## 29 ***Efficiency Analyses***

30 Data for daily ingestion rates, protein growth rates, and respiration rates were used to  
31 construct energetic efficiency models for assimilation efficiency (AE), gross growth efficiency  
32 (GGE), net growth efficiency (NGE), and protein growth efficiency (PGE). These values were

1 determined following the protocols of Rendleman et al. (2018). The following equations were  
2 used for the respective efficiencies:

3 
$$\text{Assimilation Efficiency (AE): } [(M + G) / I] \times 100$$

4 
$$\text{Gross Growth Efficiency (GGE): } [G / I] \times 100$$

5 
$$\text{Net Growth Efficiency (NGE): } [G / (G + M)] \times 100$$

6 
$$\text{Protein Growth Efficiency (PGE): } (\text{Protein Grown} / \text{Protein Ingested}) \times 100$$

7 
$$\text{Protein Depositional Efficiency: } (\text{Protein Grown} / \text{Protein Synthesized}) \times 100$$

8 M is the energy metabolized and measured through oxygen respiration rates. Oxygen  
9 consumption values were converted to energetic units using the oxyenthalpic value of 484 kJ  
10 mol<sup>-1</sup> O<sub>2</sub> (Gnaiger, 1983). G is biomass growth and was determined using changes in protein  
11 biomass. Protein values were converted to energetic equivalents using a conversion of 24 kJ g<sup>-1</sup>  
12 (Gnaiger, 1983; Schmidt-Nielsen, 1997). I represents energy acquired through ingestion.  
13 Ingestion rates of algal cells were converted to energetic units using the specific energetic  
14 content of *Rhodomonas* sp., 2.25 μJ (algal cell)<sup>-1</sup> (Vedel and Rissgard, 1993). Protein ingested  
15 was determined using the protein content of *Rhodomonas* sp., 0.053 ng protein (algal cell)<sup>-1</sup>  
16 (Rendleman et al., 2018). In order to accurately model these efficiency metrics over  
17 development, primary data (ingestion, protein growth, respiration, and protein synthesis) from all  
18 three cultures were used to create a best-fit model describing how each variable changed  
19 throughout larval development in low- and high-fed larvae. For each culture, the linear  
20 regression values (slope and y-intercept) were determined for the log<sub>10</sub>(x) transformed data  
21 (ingestion, respiration, or protein biomass) plotted against DPF. In order to take into account the  
22 slight variation in sample size per culture (i.e., the number of developmental time points  
23 measured), the weighted mean for each regression value was calculated (Sokal et al., 1987).  
24 These weighted average regression values were used to model changes in each respective  
25 variable throughout larval development for low- and high-fed larvae.

26

### 27 **Rates of protein synthesis**

28 Rates of protein synthesis were determined as described in other studies of echinoderm  
29 larvae (Pace and Manahan, 2006; Pace et al., 2010; Pan et al., 2015). <sup>14</sup>C-alanine (Perkin  
30 Elmer, MA), was used as a tracer to follow the rate of incorporation of amino acids into protein.  
31 Previous studies on echinoid larvae have shown alanine to be optimal for use as a radiolabeled  
32 tracer as it is transported rapidly from seawater into the free amino acid pool (FAA pool) and

1 subsequently incorporated into the protein pool in sufficient amounts to be accurately measured  
2 by HPLC and liquid scintillation counting (Marsh et al., 2001; Pace and Manahan, 2006, 2007a).  
3 As part of this measurement, rates of alanine amino transport were also determined (described  
4 below). Each protein synthesis determination was a 3-part kinetic assay determining 1) rates of  
5 total alanine incorporation into larvae (i.e., alanine transport rates), 2) changes in the specific  
6 activity of alanine in the precursor free amino acid (FAA) pool, and 3) rates of alanine  
7 incorporation into larval protein. The three kinetic assays were run in parallel with each other  
8 from the same stock of larvae being exposed to the  $^{14}\text{C}$ -alanine tracer. For each experiment, a  
9 known number of larvae were exposed to 10-20  $\mu\text{mol L}^{-1}$   $^{14}\text{C}$ -alanine in 10ml of seawater (total  
10 radioactivity = 5 $\mu\text{Ci}$ ). Each assay was composed of 6 individual timepoints, taken over the  
11 course of 20-25 minutes, used for calculating linear rates of change for each respective  
12 variable. The short time frame minimizes the effect of protein degradation, where  $^{14}\text{C}$ -alanine  
13 reenters the free amino acid pool due to protein degradation. The samples of larvae were  
14 placed onto an 8  $\mu\text{m}$  filter (Nucleopore) and washed with 3-times with FSW to remove  
15 unincorporated radioactivity. Using these data, whole animal rates of protein synthesis were  
16 determined using the following equation:

17

$$PS = \frac{d}{dt} \left( \frac{S_p}{S_{faa}} \right) \times \frac{MW_p}{S_m}$$

18 Where PS = protein synthesis rate in  $\text{ng larva}^{-1} \text{hr}^{-1}$ ,  $S_p$  = radioactivity in the total protein pool  
19 (procedure described below),  $S_{faa}$  = specific activity of the free amino acid pool (procedure  
20 described below),  $MW_p$  = average molecular weight of an amino acid in *D. excentricus*, and  $S_m$   
21 = the mole percent of the amino acid used in protein. The following descriptions detail the  
22 methods for acquiring the different data sets represented in the above protein synthesis  
23 equation.

24

25 *Specific activity of the free amino acid pool ( $S_{faa}$ )*

26 The  $S_{faa}$  was determined through high performance liquid chromatography (HPLC)  
27 separation of the free amino acid pool (FAA) and liquid scintillation counting (Beckman Coulter  
28 LS 6500, Brea CA) of the alanine elution peak. A known number of larvae were exposed to 10-  
29 20  $\mu\text{mol L}^{-1}$   $^{14}\text{C}$ -alanine in 10ml of seawater (total radioactivity = 5 $\mu\text{Ci}$ ). Six 500  $\mu\text{l}$  samples were  
30 taken regularly over a 25-minute interval to quantify the temporal increase in the  $S_{faa}$ . The FAA  
31 for each sample was extracted in 70% ethanol and alanine was separated from other amino  
32 acids using reverse phase HPLC (Lindroth and Mopper, 1979). Amino acids were detected  
33 using precolumn derivatization with ortho-phthalaldehyde (OPA) (Sigma Aldrich P0657). A dual

1 gradient solvent system in conjunction with a C-18 reverse phase column separated amino  
2 acids based on hydrophobicity. The gradient system progressed from hydrophilic (Solvent A:  
3 80% 50mM sodium acetate, 20% methanol) to hydrophobic (Solvent B: 20% 50mM sodium  
4 acetate, 80% methanol). Alanine was quantified through peak area comparison with standards  
5 of known concentrations. The alanine elution peak was collected in a fraction collector and its  
6 radioactivity was determined by liquid scintillation counting. This method allowed for accurate  
7 determination of changes in the precursor specific activity in the units of dpm pmol<sup>-1</sup> alanine.  
8 This value was then used to correct for the radioactive incorporation rate of <sup>14</sup>C-alanine into the  
9 protein pool.

10

#### 11 *Radioactivity in the total protein pool ( $S_p$ )*

12 Larvae sampled for determining the rates of <sup>14</sup>C-alanine incorporation into protein were  
13 immediately frozen in liquid nitrogen. For each sample 500 larvae were collected. These  
14 samples were subsequently sonicated and total protein was precipitated using cold 5%  
15 trichloroacetic acid (TCA). The protein precipitate was collected on a GF/C glass microfiber filter  
16 (Whatman, Sigma Aldrich) and then mixed with EcoScint (Fisher Scientific) scintillation cocktail.  
17 Radioactivity of the protein was determined using a Beckman (LS 6500) liquid scintillation  
18 counter. The amount of <sup>14</sup>C-alanine incorporated into total protein was converted to total alanine  
19 incorporation using the measured intracellular specific activity (<sup>14</sup>C per mol total alanine in the  
20 free amino acid pool, aka  $S_{faa}$ ). By standardizing the  $S_p$  by the  $S_{faa}$  over the duration of the  
21 experiment, the rate of total alanine incorporation was determined (pmol alanine larva<sup>-1</sup> hr<sup>-1</sup>).

22

#### 23 *Average molecular weight of an amino acid in D. excentricus and mole-percent alanine in total* 24 *protein ( $MW_p$ and $S_m$ )*

25 In order to convert alanine incorporation rates into total amino acid incorporation rates  
26 (i.e., rate of protein synthesis), the amino acid composition of larval protein (i.e., mole percent  
27 composition of protein;  $S_m$ ) and the average molecular weight of an amino acid in the protein  
28 pool ( $MW_p$ ) were determined. Amino acid composition was determined by UC Davis Core  
29 Facility using an amino acid analyzer. Protein was extracted in 5% TCA and then acid-  
30 hydrolyzed in 6 mol l<sup>-1</sup> HCl with 0.5% phenol at 110°C for 24 hours under vacuum. The acid-  
31 hydrolyzed protein was then run on a cation exchange chromatographer. Post-column ninhydrin  
32 derivitization was used to find amino acid composition.

33

34

## 1 *Total alanine larval transport*

2 Alanine transport rates were determined by measuring the increase in total larval  
3 radioactivity. While transport rates are not part of the protein synthesis calculation, they were  
4 conducted in conjunction with protein synthesis experiments. This data was also used to construct  
5 radioactivity budgets to ensure the sum of  $^{14}\text{C}$  alanine incorporation into the FAA and the total  
6 protein pool were equal to the total radioactive incorporation measured as alanine transport.  
7 Larvae were sampled and placed in a liquid scintillation vial with 5 ml of EcoScint cocktail  
8 (Fisher Scientific). Samples were counted in a Beckman (Brea, CA) LS 6500 scintillation  
9 counter. To ensure maximal rates of transport,  $^{12}\text{C}$ -alanine (i.e., “cold” alanine) was added to the  
10 experimental vial to bring the final concentration to  $20\mu\text{M}$ . Alanine transport rates were then  
11 corrected using the necessary  $^{14}\text{C}$ : $^{12}\text{C}$ -alanine ratio (hot:cold ratio). Alanine transport rates were  
12 also determined in experiments using the protein synthesis inhibitor, anisomycin, in order to  
13 assess if the inhibitor had any non-specific effects.

14

## 15 ***Cost of Protein Synthesis***

16 The energetic cost of protein synthesis [ $\text{J} (\text{mg protein synthesized})^{-1}$ ] was calculated  
17 using two different approaches. Both approaches utilized respiration rate and protein synthesis  
18 rate data, acquired as described above. A direct approach used inhibition of protein synthesis to  
19 calculate its cost at specific developmental time-points (i.e., prefeeding larvae as well as in low-  
20 and high-fed larvae at 11 and 19 DPF). This approach measured the change in respiration and  
21 protein synthesis when in the presence or absence of the eukaryotic protein synthesis inhibitor,  
22 anisomycin (Sigma-Aldrich, St. Louis, MO), which has been shown to be highly effective and  
23 specific (Fenteany et al., 1995; Pace and Manahan, 2007a). Anisomycin was used at a  
24 concentration of  $10\mu\text{M}$ . For calculating the cost of protein synthesis, rates of oxygen  
25 consumption were converted to energetic units using an oxyenthalpic conversion of  $484 \text{ kJ mol}^{-1}$   
26  $\text{O}_2$  (Gnaiger, 1983). Costs were determined by dividing the difference in metabolic rate by the  
27 difference in protein synthesis rates when in presence of the inhibitor. Therefore, the efficacy of  
28 the inhibitor was never assumed but empirically determined. Additionally, rates of alanine  
29 transport were measured during inhibitor exposure as a check for potential non-specific effects  
30 of the inhibitor.

31 We also used an indirect, correlative approach to determine the cost of protein synthesis  
32 throughout larval development. Here the relationship between changes in respiration rate and  
33 protein synthesis rate over development was assessed. These values represent normal  
34 physiological rates (i.e., no inhibitors were employed). Respiration rates were plotted (ordinate)

1 against protein synthesis rates (abscissa) and tested for a significant relationship. The slope of  
2 this relationship therefore represents the cost of protein synthesis (the change in energy  
3 consumption rate per unit increase in protein synthesis rate).

4

#### 5 **Rates and costs of protein degradation**

6 Rates of protein degradation were calculated as the difference between the modeled  
7 rates of protein synthesis and protein growth. The cost of protein degradation was taken from  
8 Pan et al. (2018) as 0.14 kJ gram<sup>-1</sup> protein degraded. As specified in Pan et al. (2018), this cost  
9 is based on the primary analysis by Peth et al. (2013) where degradation is by the 26S  
10 proteasomal pathway. This estimate is based on the assumptions that degradation occurs via  
11 the 26S pathway and requires 0.003 mol ATP gram<sup>-1</sup> protein and that 45 kJ of energy are  
12 liberated with the hydrolysis of a mole of ATP [details in Pan et al. (2018)].

13

#### 14 **Statistical Analysis**

15 Variation in morphological and physiological variables as a function of developmental  
16 time (DPF) and feeding treatment (low vs. high) were evaluated with general linear models  
17 (GLMs). Replicate cultures were treated as a random factor so that within treatment variation  
18 among cultures could be assessed. In the absence of a statistically significant interaction  
19 between main effects, analysis of covariance (ANCOVA) was used to compare adjusted mean  
20 values of the different feeding treatments; when there was a significant interaction, no further  
21 analysis was done. Prior to analyses, physiological variables were transformed using a  $\log_{10}(x)$   
22 function to correct for non-linearity, non-normality, and unequal variances as necessary. Visual  
23 inspection of model residuals was done for every analysis.

24 Regression slopes and intercepts for the three independent cultures were pooled within  
25 feeding treatments as weighted mean averages and weighted mean standard deviations to  
26 parameterize models of rate changes during development (after Sokal et al., 1987). In cases  
27 where there was a significant block effect (indicative of culture to culture variation), data were  
28 still averaged because the main effects were always much larger than the block effect (as  
29 determined by Eta squared, the ratio of effect sum of squares to total sum of squares  
30 (Thompson, 2006)) and the general outcome remained the same. All analyses were performed  
31 using Minitab 18.

32

## 1 **Results**

### 2 **Development and Induction of Morphological Plasticity**

3 Both feeding treatments were effective in supporting larval growth and development (Fig.  
4 1A). Average rates of mortality for the three cultures were similar between feeding treatments  
5 (ANOVA,  $F_{1,5} = 7.71$ ;  $P = 0.57$ ) at  $0.067 \pm 0.023 \text{ day}^{-1}$  and  $0.056 \pm 0.023 \text{ day}^{-1}$  (mean  $\pm$  SD,  
6  $N=3$ ) for low- and high-fed larvae, respectively. High-fed larvae reached metamorphic  
7 competency by at least 24 DPF, where it was observed that they were metamorphosing in the  
8 culture vessels. Low-fed larvae were not observed to reach metamorphosis in any of the culture  
9 vessels.

10 Despite the order of magnitude difference in available food, postoral (PO) arm growth  
11 was similar between low- and high-fed larvae (ANOVA,  $F_{1,13} = 0.04$ ,  $P = 0.85$ ) (Fig. 1A and Fig.  
12 1B) and there was no interaction between feeding treatment and larval age (ANOVA,  $F_{1,13} =$   
13  $1.44$ ,  $P = 0.26$ ). In contrast, for midline body length (MBL) a significant interaction between  
14 feeding treatment and age was observed (ANOVA,  $F_{1,13} = 27.76$ ,  $P < 0.001$ ), indicative of faster  
15 rates of MBL growth in high-fed larvae (Fig. 1C). The relationship between PO length and MBL  
16 exhibited a significant feeding treatment effect (ANOVA,  $F_{1,13} = 11.36$ ,  $P = 0.007$ ), indicating that  
17 at any given MBL, low-fed larvae had a longer PO length (Fig. 1D). These results are similar to  
18 those in our previous study (Rendleman et al., 2018).

19

### 20 **Physiological Plasticity**

21 Rates of protein growth (Fig. 2A), algal ingestion (Fig. 2B), and respiration (Fig. 2C)  
22 were measured so as to ensure the patterns of physiological plasticity that were documented in  
23 Rendleman et al. (2018) were observed in this study as well, which used identical culturing and  
24 treatment conditions. Larval protein biomass increased throughout development for both feeding  
25 treatments (Fig. 2A). There was a strong interaction between feeding treatment and larval age  
26 (DPF) (ANOVA,  $F_{1,38} = 20.35$ ;  $P < 0.001$ ; Table 1), indicative of protein biomass starting from a  
27 common value and high-fed larvae growing at a faster rate than low-fed larvae. By 23 DPF, low-  
28 fed larvae had  $309 \text{ ng larva}^{-1}$ , while high-fed larvae had  $1420 \text{ ng larva}^{-1}$  (using the common  
29 regression lines illustrated in Fig. 2A). At 42 DPF, low-fed larvae had  $763 \text{ ng protein larva}^{-1}$ .  
30 Relative growth rates (RGR) were significantly different in low- and high-fed larvae (ANOVA,  $F_{1,}$   
31  $5 = 13.8$ ;  $P < 0.05$ ). High-fed rates were 2-times faster (Fig. 2A, inset), with average values of  
32  $6.0 (\pm 0.59)\% \text{ day}^{-1}$  and  $12.2 (\pm 1.6)\% \text{ day}^{-1}$  ( $N=3$ ,  $\pm$  SE) for low- and high-fed larvae,  
33 respectively.

1 Rates of algal ingestion (Fig. 2B) increased for low- and high-fed larvae with  
2 development. Rates were always higher in high-fed larvae and no statistical interaction was  
3 observed between feeding treatment and larval age (Table 1). Differences in feeding rates were  
4 reflective of the 10-fold difference in available algae. For example, at 25 DPF rates of ingestion  
5 were 691 and 5,230 algal cells day<sup>-1</sup> ind<sup>-1</sup> for low- and high-fed larvae, respectively. Larval rates  
6 of respiration (Fig. 2C) increased significantly with larval age ( $F_{1, 32} = 204$ ;  $P < 0.001$ ; Table 1).  
7 There was a significant interaction between feeding treatment and larval age ( $F_{1, 32} = 9.51$ ;  $P =$   
8  $0.004$ ; Table 1), indicating that rates of respiration were increasing faster in high-fed relative to  
9 low-fed larvae during development.

10 Rates of protein growth, algal ingestion, and respiration were used to model  
11 physiological efficiencies relating to digestion and growth. The regression variables to model  
12 these changes in energy acquisition were determined by taking the weighted average  
13 regression variables for each metric (taking into consideration unequal samples sizes for each  
14 independent culture). These values and their standard deviations are given in Fig. S1. Using  
15 these values, the daily changes in energy acquired, respired, and invested into growth were  
16 determined for low- and high-fed larvae (Fig. S2). These values were then used to construct the  
17 models for daily changes in assimilation efficiency (AE), gross growth efficiency (GGE), net  
18 growth efficiency (NGE), and protein growth efficiency (PGE) (see methods for details of  
19 calculations) and are displayed in Fig. 2D. For all efficiencies that were standardized to the  
20 amount of energy acquired (i.e., AE, GGE, and PGE), a common pattern was observed. Low-  
21 fed larvae initially had high efficiencies that decreased rapidly as development proceeded. High-  
22 fed larvae had low efficiencies that increased rapidly during development. This resulted in high-  
23 fed larvae efficiencies surpassing low-fed efficiencies by 18 DPF. A comparison of these  
24 efficiencies at 24 DPF (the end of the high-fed culture) shows that high-fed larvae had a 1.6-  
25 times higher AE, and 2.0 times higher GGE and PGE than low-fed larvae. Net growth  
26 efficiencies also exhibited the same diverging pattern however both low- and high-fed started at  
27 a similar value of ~ 53%, which increased to 61% in high-fed and decreased to 49% in low-fed  
28 by 24 DPF. After 24 DPF, low-fed values continued to decrease for all efficiencies metrics with  
29 the following values at 42 DPF (the last day of monitoring for low-fed larvae): AE = 32%, GGE =  
30 14%, NGE = 44%, PGE = 25%.

31  
32  
33  
34



## 1 **Protein Metabolism**

### 2 *Alanine Transport Rates*

3 Rates of alanine transport increased with development for both low- and high-fed larvae  
4 (Fig. 3A). While rates were similar in early development, the increase in transport rates was  
5 faster in high-fed larvae as evidenced by a significant interaction between feeding treatment and  
6 larval age (ANOVA,  $F_{1,32} = 21.55$ ,  $P < 0.001$ , Table 1). When transport rates were standardized  
7 to protein biomass (Fig. 3B), the developmental increase in alanine transport rates was only  
8 marginally significant (ANOVA,  $F_{1,32} = 3.92$ ,  $P = 0.06$ , Table 1). In contrast to whole larval rates,  
9 mass-specific transport rates in low-fed were now significantly higher than rates in high-fed  
10 larvae (ANOVA,  $F_{1,32} = 4.49$ ,  $P = 0.042$ , Table 1). Adjusted mean mass-specific transport rates  
11 (inset, Fig. 3B) were ~ 2-times higher for low-fed larvae compared to high-fed larvae (i.e., 0.088  
12 and 0.043 pmol hr<sup>-1</sup> (μg protein)<sup>-1</sup>, respectively).  
13

### 14 *Protein Synthesis Rates*

15 Amino acid composition (both  $S_m$  and  $MW_p$ ) was similar for prefeeding (3 DPF) and low-  
16 and high-fed larvae (19 DPF) (Supplemental Table S1). The average percent of alanine in total  
17 protein was 9.5% ± 0.61 (mean ± SD; n = 3). The average molecular weight of an amino acid in  
18 the total protein pool ( $MW_p$ ) was 126.0 g mol<sup>-1</sup> ± 0.25 (mean ± SD; n = 3).

19 Prefeeding rates of protein synthesis (3 DPF) were ~ 1 ng hr<sup>-1</sup> ind<sup>-1</sup> (Fig. 4A). Upon  
20 initiation of feeding, low-fed rates initially decreased while high-fed rates increased. As  
21 development progressed, both low- and high-fed larvae exhibited significant increases in rates  
22 of protein synthesis (ANOVA,  $F_{1,32} = 76.87$ ,  $P < 0.001$ , Table 1). As no significant interaction  
23 was observed between feeding treatment and larval age, rates increased similarly (Table 1).  
24 However, for any given age high-fed larvae had a significantly higher protein synthesis rate than  
25 low-fed larvae (ANOVA,  $F_{1,32} = 12.61$ ,  $P = 0.001$ , Table 1). When rates of synthesis were  
26 standardized to larval biomass (i.e., fractional rate of protein synthesis), representing the  
27 percent of the total protein pool that was being synthesized, values ranged from 0.5 to 1.5% hr<sup>-1</sup>  
28 (Fig. 4B). Unlike whole organismal rates of protein synthesis, fractional rates of protein  
29 synthesis were similar between low- and high-fed larvae (ANOVA,  $F_{1,32} = 1.59$ ,  $P = 0.218$ , Table  
30 1), indicating that increases in whole-larval protein synthesis rates (Fig. 4A) were driven by  
31 increases in protein biomass (Fig. 2A).  
32  
33  
34

## 1 *Rates and metabolic importance of protein degradation*

2 Fractional rates of protein degradation (Fig. 4C) were modeled using the data for protein  
3 growth (Fig. 2A) and protein synthesis (Fig. 4A). This assumes that for growing organisms  
4 (experiencing an increase in protein biomass) the amount of protein degradation is equal to the  
5 difference between protein synthesized and protein grown (Hawkins, 1991; Houlihan, 1991).  
6 Unlike fractional rates of protein synthesis, there was a noticeable influence of feeding treatment  
7 on rates of protein degradation. Fractional rates of protein degradation for low-fed larvae  
8 increased 17-fold (0.048 to 0.80 ng degraded ng<sup>-1</sup> protein biomass) from 4-42 DPF. For high-  
9 fed, rates decreased moderately from 0.37 to 0.25 ng degraded ng<sup>-1</sup> protein biomass (from 4-24  
10 DPF). The percent of metabolism used to fuel these rates of degradation (Fig. 4C, inset) was  
11 low for both treatments, but increased for low-fed from 0.1 to 1.8% of metabolism. High-fed  
12 larvae used about 0.5% of metabolism to fuel protein degradation.

13

## 14 *Energetic Cost of Protein Synthesis*

15 The energetic cost of protein synthesis was measured using two different techniques.  
16 The first approach (Fig. 5A) used parallel measurements of protein synthesis and respiration  
17 rates with and without the protein synthetic inhibitor, anisomycin. This measurement allowed for  
18 determinations of cost at specific developmental time points. The rates used to calculate these  
19 costs are shown in Fig. 5A, with the total height of bars representing non-inhibited rates and  
20 black bars showing rates during anisomycin inhibition. The inset shows the average costs for  
21 each treatment and for prefeeding stages (3 DPF). No significant differences were observed for  
22 this direct analysis of protein synthesis cost (ANOVA,  $F_{1,5} = 0.82$ ,  $P = 0.52$ ) between prefeeding,  
23 low-fed, and high-fed larvae. The average cost for all treatments (Fig. 5A, inset) was  $4.47 \pm 0.63$   
24 J (mg protein synthesized)<sup>-1</sup> ( $\pm$  SE, N = 6). To further assess the specificity of anisomycin  
25 inhibition, rates of alanine transport both with and without inhibitor were measured at 11, 19,  
26 and 23 DPF in low- and high-fed larvae (Fig. S3). There were no significant differences in  
27 transport rates between anisomycin-exposed and non-exposed larvae (paired t-test:  $t(5) = 0.96$ ,  
28  $P = 0.38$ ).

29 The second approach for determining cost of protein synthesis was to investigate the  
30 average cost throughout low- and high-fed larval development by quantifying the change in  
31 metabolic rates with protein synthesis rates throughout development (Fig. 5B, correlative cost of  
32 synthesis). There was a modest effect of feeding treatment (ANOVA,  $F_{1,32} = 5.29$ ,  $P = 0.028$ ,  
33 Table 1). However, there was no significant interaction between treatment and larval age  
34 (ANOVA,  $F_{1,32} = 2.16$ ,  $P = 0.152$ , Table 1), indicating that the slopes of the regression between

1 metabolic rate and protein synthesis rate for low- and high-fed larvae were similar. The  
2 treatment effect therefore is a result of a difference in the y-intercept of this relationship. As this  
3 energetic analysis uses only the slope of the relationship to estimate cost, a pooled regression  
4 for low- and high-fed larvae was used to determine the cost of protein synthesis. The common  
5 slope for both low- and high-fed is displayed as the solid line on Fig. 5B. This slope (which  
6 represents the amount of energy used per ng protein synthesized) results in a cost of synthesis  
7 of  $5.34 \pm 0.51$  J (mg protein synthesized)<sup>-1</sup> ( $\pm$  standard error of the slope, N = 33). For reference,  
8 the regressions for low- and high-fed are also shown (Fig. 5B, dashed lines), indicating similar  
9 slope values. The costs of synthesis for low- and high-fed separately were 4.29 and 5.58 J (mg  
10 protein synthesized)<sup>-1</sup>, respectively.

11

### 12 *Percent Metabolism and Depositional Efficiency*

13 Primary data relating to rates of protein growth (Fig. 2A), protein synthesis (Fig. 4A), and  
14 respiration (Fig. 2C) were used to model the protein depositional efficiency and the amount of  
15 metabolism used to support protein synthesis in low- and high-fed larvae. Protein depositional  
16 efficiency (PDE) (Fig. 6A) exhibited a trend that was similar to that observed in other  
17 physiological efficiencies (e.g., compare with Fig. 2D). Low-fed larvae had an initial efficiency  
18 that was 1.4-times higher than high-fed (83% and 60%, respectively). PDE decreased quickly in  
19 low-fed larvae while increasing modestly in high-fed larvae. At 24 DPF PDE was 1.6-times  
20 higher in high-fed than low-fed (66% and 41%, respectively).

21 To estimate the percent of metabolism used to support measured rates of protein  
22 synthesis, an average cost of protein synthesis was calculated at 4.91 J (mg protein  
23 synthesized)<sup>-1</sup>. This cost is the average of estimates from the inhibitor and correlative  
24 approaches (4.47 and 5.34 J (mg protein synthesized)<sup>-1</sup>, respectively). The average percent of  
25 metabolism supporting protein synthesis rates were similar between feeding treatments  
26 (ANOVA,  $F_{1,32} = 0.59$ ,  $P = 0.45$ ) at about 50% (Fig. 6B).

27

## 1 **Discussion**

2           The goal of the current study was to define strategies relating to protein metabolism that  
3 are employed by organisms growing at different rates as a result of differing food environments.  
4 To do this, we have extended our analysis of physiological plasticity in larvae of the sand dollar,  
5 *D. excentricus*. Our previous work (Rendleman et al., 2018) examining energetic growth  
6 efficiencies, using the same conditions as in this study, implicated significant differences in the  
7 synthetic efficiency and/or the energetic cost of protein metabolism. The results of this study  
8 specifically test these ideas and show that there are both significant differences in protein  
9 metabolism as well as important similarities between larvae growing at different rates. These  
10 data provide empirical evidence that organisms can respond to different food environments by  
11 exploiting different macromolecular turnover strategies to achieve growth.

### 12 **Protein metabolism and differential growth during early development**

13           The most important result of this study was that the large-scale differences in growth  
14 rate between low- and high-fed larvae were achieved by differences in mass-specific rates of  
15 protein degradation and not by differences in mass-specific rates of protein synthesis. While  
16 there were major differences in organismal rates of protein synthesis between low- and high-fed  
17 larvae, these differences were a result of high-fed larvae having a higher biomass than low-fed  
18 larvae. This is to be expected given the 10-fold difference in food availability. However, once  
19 synthesis rates were standardized to protein biomass (i.e., fractional rates of protein synthesis),  
20 rates of synthesis were similar between feeding treatments. Fractional rates of synthesis in this  
21 study of  $\sim 0.5\text{-}1\% \text{ hr}^{-1}$  were similar to those for other echinoderm larvae experiencing positive  
22 growth (Pace and Manahan, 2006, 2007b; Ginsburg and Manahan, 2009).

23           The significant differences in protein depositional efficiency (PDE) between low- and  
24 high-fed larvae were an outcome of the treatment-specific differences in protein degradation.  
25 These differences in PDE provide at least a partial explanation for the large differences that  
26 were observed in protein growth efficiency (PGE) in both our original study of physiological  
27 plasticity (Rendleman et al., 2018) and the current study. With low-fed larvae being able to  
28 deposit more synthesized tissue as biomass (in early development), this results in high PGE  
29 and PDE values. Given that protein is the predominant biochemical substrate of these larvae  
30 (Rendleman et al., 2018), these differences in PDE can be viewed as the driving force for the  
31 differential growth efficiencies in these larvae when experiencing different food levels. A recent  
32 study employing similar techniques for measuring protein metabolism examined genotype-

1 dependent differences in growth among different families of bivalve oyster larvae (Pan et al.,  
2 2018). Interestingly, the authors found growth differences to be related to differences in protein  
3 synthesis rates rather than changes in protein depositional efficiency. While comparison  
4 between the two studies is difficult due to our study manipulating environment and Pan et al.  
5 (2018) manipulating genotype to alter growth, as well as the difference in species studied, both  
6 studies demonstrate the important role that protein metabolism exerts on overall growth and  
7 development in feeding larval forms.

8 No significant differences were observed in the energetic cost of protein synthesis or its  
9 metabolic regulation in low- and high-fed larvae. As protein synthesis is typically the single-most  
10 expensive metabolic process (Hawkins, 1991; Houlihan, 1991), we used two techniques to  
11 arrive at an accurate energetic estimate of this critical cost. Both estimates returned similar  
12 energetic values with an average cost of 4.91 J (mg protein synthesized)<sup>-1</sup>. The first method  
13 relied on the eukaryotic translation inhibitor, anisomycin. This analysis allows for measuring  
14 costs in different feeding treatments at specific developmental times. A previous study has  
15 shown anisomycin to be both a specific and potent inhibitor of protein synthesis in larval  
16 echinoids (Pace and Manahan, 2007a). Based on the measured amount of inhibition and its  
17 lack of effect on alanine transport rates, our current analysis supports these previous findings.  
18 The second approach used a correlative method in which the average cost of synthesis over the  
19 entire range of larval development was estimated. We observed similar energetic costs of  
20 protein synthesis with respect to technique employed and with regards to feeding treatment and  
21 developmental stage. Furthermore, our energetic determinations of cost are similar to previous  
22 studies on larval echinoderms (Pace and Manahan, 2006, 2007a; Pan et al., 2015). Because we  
23 observed no significant differences in energetic cost, we could use this value to examine if the  
24 metabolic regulation of protein synthesis was feeding treatment specific. Here too, no significant  
25 differences were observed, and the average percent of metabolic energy used to support  
26 measured rates of synthesis was ~ 50%. This value of ~ 50% is in agreement with other studies  
27 of marine invertebrate larvae (Pace and Manahan, 2007a; Lee et al., 2016; Pan et al., 2018).

28 While rates of protein degradation were the major difference in growth efficiency  
29 between low- and high-fed larvae, the associated costs of degradation did not appear to be a  
30 significant factor in the plasticity response. The amount of metabolism required to support  
31 degradation rates increased for low-fed larvae over development, however, the estimated  
32 percent of metabolism was no more than 2%. These costs were estimated using the approach  
33 of Pan et al. (2018) relying on the cost of degradation measured by Peth et al. (2013). These

1 estimates are for proteasomal degradation and likely have a significant amount of variance due  
2 to the folding patterns of degraded proteins, their level of ubiquitination, as well as differential  
3 costs associated with other degradation pathways. Even so, the total contribution appears to be  
4 relatively small, meaning the burden of high degradation rates is related to the high cost of  
5 resynthesizing those proteins that were degraded.

6 With both treatments having similar mass-specific rates of synthesis, the same energetic  
7 cost of synthesis, and utilizing a similar proportion of metabolism to support those rates, it  
8 seems likely that there are significant differences in the types of proteins that are being made.  
9 Given the 10-times higher food availability, high-fed larvae are likely making proportionally more  
10 structural proteins that can be deposited as biomass to support larval development as well as  
11 the creation of the juvenile rudiment. With significantly less food, low-fed larvae are likely  
12 making a proportionally higher number of metabolic enzymes serving regulatory purposes (i.e.,  
13 house-keeping processes). These enzymes typically experience higher rates of turnover and  
14 would be a significant contributor to the relatively higher degradation rates. Importantly, these  
15 degradation rates increase over time and result with low-fed larvae having PDE values that are  
16 ~3-times less than high-fed by the end of development.

### 17 **Physiological mechanisms of developmental plasticity**

18 Previous studies have indirectly implicated the role of protein metabolism in food-  
19 induced developmental plasticity in echinoid larvae (Heyland and Hodin, 2004; Carrier et al.,  
20 2015; Rendleman et al., 2018). For example, Heyland and Hodin (2004), demonstrated that  
21 exogenous thyroxine treatment can recapitulate the high-fed morphological phenotype (short  
22 arms, rapid rudiment development). Thyroxine is known to influence protein turnover rates  
23 (Sokoloff and Kaufman, 1961; Bates and Holder, 1988). In a transcriptomic study, Carrier et al.  
24 (2015) found evidence for the role of TOR (target of rapamycin) for regulating growth and  
25 development. TOR is known to be a master regulator of protein synthesis, with high levels  
26 causing an increase in ribosome biogenesis and subsequent up-regulation of translational  
27 processes (Raught et al., 2001). The direct measurements of protein metabolism in this study  
28 support these previous studies. The action of TOR may provide an explanation for why high-fed  
29 larvae are able to maintain equivalent levels of mass-specific protein synthesis despite their  
30 very rapid increase in protein biomass. TOR is also known to negatively regulate  
31 macroautophagy. For example during invertebrate larval development, TOR levels decrease  
32 when there is nutritional stress, increasing rates of macroautophagy (Scott et al., 2004; Di  
33 Bartolomeo et al., 2010; Romanelli et al., 2014). This provides an explanation for the higher

1 overall degradation rates in low-fed as development proceeds, thereby allowing for the  
2 synthesis of high-turnover proteins. Adams et al. (2011) demonstrated that dopaminergic  
3 receptors respond to food environment and appear to cause the induction of the short-armed,  
4 high-fed larval phenotype. Due to the wide range of effects that dopamine can have on cellular  
5 physiology, it is difficult to know, at this time, what role it might play with regards to protein  
6 metabolism. Dopamine signaling is known to influence cellular plasticity by changing aspects of  
7 protein metabolism (Hasselgren et al., 1983; Smith et al., 2005; Pfeiffer and Huber, 2006). In *C.*  
8 *elegans* dopamine signaling results in higher levels of proteasomal degradation by increasing  
9 polyubiquitination of protein substrates (Joshi et al., 2016). This dopaminergic response, which  
10 is located in the epithelial cells of the worm, is activated when the worm encounters a bacterial  
11 lawn for feeding. Given the highly specific location of dopamine receptors at the tips of the  
12 pluteus larva's post oral arms (Adams et al., 2011), this raises the possibility that the induction  
13 of the short-armed phenotype may be driven by increased degradation rates at the larval arms.  
14 This could then allow tissue growth to be focused towards post-larval structures such as the  
15 stomach and rudiment. These results are consistent with the increases seen in PDE as high-fed  
16 larvae develop and could be the consequence of increasing levels of TOR. Future analyses  
17 testing for such morphologically specific differences in protein homeostasis, as well as  
18 examining specific pathways of protein degradation (proteasomal vs autophagy) will be  
19 important for further understanding the role of both TOR and dopamine signaling mechanisms in  
20 the plasticity response.

21 Our analysis of protein metabolism also indicated that amino acid transport may play a  
22 critical role in the developmental plasticity response. Low-fed larvae had rates of alanine  
23 transport that were ~2-times higher than high-fed larvae. This result is of interest because it is  
24 likely related to the morphological plasticity response. The long-armed phenotype of low-fed  
25 larvae has been interpreted as a means to increase their feeding ability on algal cells (Hart and  
26 Strathmann, 1994). Meyer and Manahan (2009) found that amino acid transporters are primarily  
27 localized to the external epithelium of pluteus larvae, including the larval arms. The transport of  
28 dissolved organic material (DOM), such as alanine, has been shown to be an important  
29 contributor to acquiring energetic substrates for supporting larval metabolism (Manahan, 1990;  
30 Shilling and Manahan, 1994). Therefore, a long-armed phenotype may also serve the purpose  
31 of allowing greater access to the dissolved organic material (DOM) pool by way of increasing  
32 the epithelial surface area. It is also possible that low-fed larvae increase the epithelial density  
33 of DOM transporters. Such transporter mechanisms could also act as an environmental sensing  
34 mechanism by which plasticity responses are induced in prefeeding stages.

1           In total, the findings from other echinoid developmental plasticity studies in combination  
2 with the current results suggest an integrated response to food levels involving physiological  
3 and morphological responses which complement one another. Food conditions are sensed prior  
4 to the onset of feeding ability (Miner, 2007; Adams et al., 2011). If the larva is in a high food  
5 environment, then dopamine signaling will cause the induction of the short-armed phenotype  
6 (Adams et al., 2011). Part of this response may involve changes in protein turnover which have  
7 a negative influence on arm length and allow greater growth in post-larval structures to be  
8 supported. If food levels are low, then the default pathway of long larval arms is followed. The  
9 longer arms allow increased feeding ability (Hart and Strathmann, 1994) and DOM transport  
10 rates (this study). The increased algal feeding is supported by higher digestive efficiency  
11 (Rendleman et al., 2018 and this study). This increased digestive efficiency is further enhanced  
12 by increased protein depositional efficiency (this study), which is supported by the down-  
13 regulation of protein degradation. It is of interest that the default pathway elicits greater initial  
14 protein metabolic and growth efficiency. Understanding the molecular mechanisms that allow for  
15 high efficiency growth and comparing them to larval forms that do not have developmental  
16 plasticity would be of interest.

17           Relating these morphological and physiological responses to their adaptive value for the  
18 entirety of larval development is critical to understanding the actual ecophysiological value of  
19 developmental plasticity. It has been observed that the differential arm length response occurs  
20 early in larval development (Boidron-Metairon, 1988; Sewell et al., 2004; Miner, 2007).  
21 Physiologically, large differences in both digestive efficiency and growth efficiency (Rendleman  
22 et al., 2018 and this study) that benefit low-fed larvae are also seen only in early larval  
23 development. These results may be indicative of the cost-benefit relationship between nutrient  
24 acquisition and surface area exposure. Longer arms might also result in the need for greater  
25 surface area ion regulation. Previous research has demonstrated that the Na<sup>+</sup>-K<sup>+</sup>-ATPase pump  
26 can consume ~40% of larval metabolic energy (Leong and Manahan, 1997). Therefore, there  
27 may be a limit to the extent, both in total arm length and in length of developmental time, that  
28 long arms are adaptive. The long-armed phenotype may provide its greatest benefit early in the  
29 larval stage so as to allow the larva to find a more supportive nutritional environment without  
30 incurring large costs for surface area exposure. After early larval development, the survival  
31 strategy may alter to one of overall metabolic down-regulation with specific decreases in protein  
32 metabolism relating to growth in order to save energy and await better feeding conditions. In  
33 studies examining protein synthesis in unfed echinoid larvae (i.e., receiving no algal food),  
34 metabolic regulation of protein synthesis decreased to 16-21% of metabolism (Pace and



1 Manahan, 2006; Pan et al., 2015), allowing for the maintenance of other essential processes  
2 such as Na<sup>+</sup>-K<sup>+</sup>-ATPase . These plastic physiological strategies likely allow for the long-term  
3 survival observed in nutritionally-stressed larvae (e.g., Moran and Manahan, 2004; Carrier et al.,  
4 2015).

## 5 **Echinoid larvae as a model system for developmental plasticity**

6 The importance of, as well as the need to better understand, developmental plasticity  
7 has been expressed by evolutionary biologists, molecular biologists, ecologists, and  
8 physiologists (e.g., DeWitt et al., 1998; Miner et al., 2005; Evans and Hofmann, 2012; Uller et  
9 al., 2020). The developmental biology of sea urchins has long attracted researchers from all of  
10 these fields, resulting in a powerful set of integrative biological information. In conjunction with  
11 this, echinoid larvae have been the subject of many studies regarding developmental plasticity  
12 (recently reviewed in McAlister and Miner, 2018). These studies have shed important light on  
13 the molecular, morphological, and physiological manifestation of developmental plasticity. By  
14 virtue of these combined datasets, continued efforts using this system will provide a highly  
15 informative and integrated platform for understanding how organisms respond to changes in  
16 other important environmental conditions (e.g., temperature, pH, pollutants).

17 A critical point that has been brought up in previous analyses regarding developmental  
18 plasticity in echinoids is the need for experimental replication. Sewell et al. (2004) observed  
19 significant within-treatment variation associated with culture chambers. It has been  
20 recommended that future studies employ experimental designs by which to assess and partition  
21 this variation from the among-treatment effects (Sewell et al., 2004; McAlister and Miner, 2018).  
22 This current study, as well as our previous study on growth efficiency (Rendleman et al., 2018)  
23 employed 3 independent cultures (e.g., spawned at different times of the year using different  
24 parents). This was especially important given the integrative nature of our physiological  
25 measurements (e.g., combining both metabolic rate and protein synthesis rates) which can  
26 result in relatively large amounts of variance. We did observe significant within-treatment  
27 variation for both ingestion rates and respiration rates. However, this variation did not obscure  
28 the effect of food availability. In total, we now have six independent cultures, over the course of  
29 4 years (initiated in different seasons), that show a consensus signal in the physiological  
30 strategies that are exploited to achieve positive growth in larvae experiencing different amounts  
31 of food. It is apparent that significant physiological plasticity, specifically relating to protein  
32 synthetic efficiency, accompanies the well-characterized morphological plasticity of these  
33 larvae. Future experiments will further explore this system to discover more regarding its

1 mechanisms and adaptive value as well as identify its linkage to other important attributes of  
2 developmental plasticity such as TOR and dopamine signaling.

3

#### 4 **Acknowledgements**

5 The authors thank Yvette Ralph for assistance in acquiring and maintaining adult sand dollars.  
6 We thank Kendra Ellis, Noah Grunfeld, Matan Grunfeld, and Annie Jean Rendleman for  
7 assistance with larval culturing and morphological and biochemical analyses. Dr. Bengt Allen  
8 assisted with statistical analyses. Dr. Bruno Pernet provided critical feedback on an earlier draft  
9 of this paper. This work was supported by the National Institute of General Medical Sciences of  
10 the National Institutes of Health under Award Numbers UL1GM118979, TL4GM118980, and  
11 RL5GM118978. The content is solely the responsibility of the authors and does not necessarily  
12 represent the official views of the National Institutes of Health. Funding was also provided by  
13 CSU-COAST (Council on Ocean Affairs, Science and Technology) and from the Los Angeles  
14 Rod and Reel Scholarship fund (awards to A. Ellison).

## References

- Adams, D.K., Sewell, M.A., Angerer, R.C., Angerer, L.M., 2011. Rapid adaptation to food availability by a dopamine-mediated morphogenetic response. *Nature communications* 2, 592.
- Bates, P.C., Holder, A.T., 1988. The anabolic actions of growth hormone and thyroxine on protein metabolism in Snell dwarf and normal mice. *Journal of Endocrinology* 119, 31-41.
- Berg, J.M., Tymoczko, J.L., Stryer, L., 2012. *Biochemistry*/Jeremy M. Berg, John L. Tymoczko, Lubert Stryer; with Gregory J. Gatto, Jr. New York: WH Freeman.
- Bertram, D.F., Strathmann, R.R., 1998. EFFECTS OF MATERNAL AND LARVAL NUTRITION ON GROWTH AND FORM OF PLANKTOTROPHIC LARVAE. *Ecology* 79, 315-327.
- Boidron-Metairon, I.F., 1988. Morphological plasticity in laboratory-reared echinoplutei of *Dendraster excentricus* (Eschscholtz) and *Lytechinus variegatus* (Lamarck) in response to food conditions. *Journal of Experimental Marine Biology and Ecology* 119, 31-41.
- Byrne, M., Sewell, M.A., Prowse, T.A.A., 2008. Nutritional ecology of sea urchin larvae: influence of endogenous and exogenous nutrition on echinopluteal growth and phenotypic plasticity in *Tripneustes gratilla*. *Functional Ecology* 22, 643-648.
- Carrier, T.J., King, B.L., Coffman, J.A., 2015. Gene Expression Changes Associated With the Developmental Plasticity of Sea Urchin Larvae in Response to Food Availability. *The Biological Bulletin* 228, 171-180.
- Conceição, L.E.C., Dersjant-Li, Y., Verreth, J.A.J., 1998. Cost of growth in larval and juvenile African catfish (*Clarias gariepinus*) in relation to growth rate, food intake and oxygen consumption. *Aquaculture* 161, 95-106.
- Cucci, T.L., Shumway, S.E., Brown, W.S., Newell, C.R., 1989. Using phytoplankton and flow cytometry to analyze grazing by marine organisms. *Cytometry* 10, 659-669.
- DeWitt, T.J., Sih, A., Wilson, D.S., 1998. Costs and limits of phenotypic plasticity. *Trends in Ecology & Evolution* 13, 77-81.
- Di Bartolomeo, S., Nazio, F., Cecconi, F., 2010. The Role of Autophagy During Development in Higher Eukaryotes. *Traffic* 11, 1280-1289.
- Evans, T.G., Hofmann, G.E., 2012. Defining the limits of physiological plasticity: how gene expression can assess and predict the consequences of ocean change. *Philosophical Transactions of the Royal Society B: Biological Sciences* 367, 1733-1745.
- Fenteany, G., Standaert Rf Fau - Lane, W.S., Lane Ws Fau - Choi, S., Choi S Fau - Corey, E.J., Corey Ej Fau - Schreiber, S.L., Schreiber, S.L., 1995. Inhibition of proteasome activities and subunit-specific amino-terminal threonine modification by lactacystin. *Science* 268, 726-731.
- Finley, D., 2009. Recognition and Processing of Ubiquitin-Protein Conjugates by the Proteasome. *Annual Review of Biochemistry* 78, 477-513.
- Fraser, K.P.P., Rogers, A.D., 2007. Protein Metabolism in Marine Animals: The Underlying Mechanism of Growth, *Advances in Marine Biology*. Academic Press, pp. 267-362.
- Ginsburg, D.W., Manahan, D.T., 2009. Developmental physiology of Antarctic asteroids with different life-history modes. *Marine biology* 156, 2391-2402.
- Gnaiger, E., 1983. Calculation of energetic and biochemical equivalents of respiratory oxygen consumption, Polarographic oxygen sensors. Springer, pp. 337-345.
- Hart, M.W., Strathmann, R.R., 1994. Functional consequences of phenotypic plasticity in echinoid larvae. *The Biological Bulletin* 186, 291-299.
- Hasselgren, P.-O., Biber, B., Fornander, J., 1983. Improved blood flow and protein synthesis in the postschismic liver following infusion of dopamine. *Journal of Surgical Research* 34, 44-52.
- Hawkins, A.J.S., 1991. Protein Turnover: A Functional Appraisal. *Functional Ecology* 5, 222-233.

- Heyland, A., Hodin, J., 2004. Heterochronic Developmental Shift Caused By Thyroid Hormone In Larval Sand Dollars And Its Implications For Phenotypic Plasticity And The Evolution Of Nonfeeding Development. *Evolution* 58, 524-538.
- Houlihan, D.F., 1991. Protein Turnover in Ectotherms and Its Relationships to Energetics, *Advances in Comparative and Environmental Physiology*. Springer Berlin Heidelberg, pp. 1-43.
- Joshi, K.K., Matlack, T.L., Rongo, C., 2016. Dopamine signaling promotes the xenobiotic stress response and protein homeostasis. *The EMBO journal* 35, 1885-1901.
- Lee, J.W., Applebaum, S.L., Manahan, D.T., 2016. Metabolic Cost of Protein Synthesis in Larvae of the Pacific Oyster (*Crassostrea gigas*) Is Fixed Across Genotype, Phenotype, and Environmental Temperature. *The Biological Bulletin* 230, 175-187.
- Leong, P., Manahan, D., 1997. Metabolic importance of Na<sup>+</sup>/K<sup>+</sup>-ATPase activity during sea urchin development. *The Journal of Experimental Biology* 200, 2881-2892.
- Lindroth, P., Mopper, K., 1979. High performance liquid chromatographic determination of subpicomole amounts of amino acids by precolumn fluorescence derivatization with o-phthaldialdehyde. *Analytical Chemistry* 51, 1667-1674.
- Lizárraga, D., Danihel, A., Pernet, B., 2017. Low concentrations of large inedible particles reduce feeding rates of echinoderm larvae. *Marine Biology* 164, 102.
- Manahan, D.T., 1990. Adaptations by invertebrate larvae for nutrient acquisition from seawater. *American Zoologist* 30, 147-160.
- Marsh, A.G., Manahan, D.T., 1999. A method for accurate measurements of the respiration rates of marine invertebrate embryos and larvae. *Marine Ecology Progress Series* 184, 1-10.
- Marsh, A.G., Maxson, R.E., Manahan, D.T., 2001. High Macromolecular Synthesis with Low Metabolic Cost in Antarctic Sea Urchin Embryos. *Science* 291, 1950-1952.
- McAlister, J.S., Miner, B.G., 2018. Phenotypic plasticity of feeding structures in marine invertebrate larvae. Oxford University Press Oxford, UK.
- McEdward, L.R., 1984. Morphometric and metabolic analysis of the growth and form of an echinopluteus. *Journal of Experimental Marine Biology and Ecology* 82, 259-287.
- Meyer, E., Manahan, D.T., 2009. Nutrient Uptake by Marine Invertebrates: Cloning and Functional Analysis of Amino Acid Transporter Genes in Developing Sea Urchins (*Strongylocentrotus purpuratus*). *The Biological Bulletin* 217, 6-24.
- Miner, B., 2011. Mechanisms underlying feeding-structure plasticity in echinoderm larvae. *Mechanisms of Life History Evolution: The Genetics and Physiology of Life History Traits and Trade-Offs*, 221-229.
- Miner, B.G., 2007. Larval feeding structure plasticity during pre-feeding stages of echinoids: Not all species respond to the same cues. *Journal of Experimental Marine Biology and Ecology* 343, 158-165.
- Miner, B.G., Sultan, S.E., Morgan, S.G., Padilla, D.K., Relyea, R.A., 2005. Ecological consequences of phenotypic plasticity. *Trends in Ecology & Evolution* 20, 685-692.
- Miner, B.G., Vonesh, J.R., 2004. Effects of fine grain environmental variability on morphological plasticity. *Ecology Letters* 7, 794-801.
- Moran, A.L., Manahan, D.T., 2004. Physiological recovery from prolonged 'starvation' in larvae of the Pacific oyster *Crassostrea gigas*. *Journal of Experimental Marine Biology and Ecology* 306, 17-36.
- Pace, D.A., Manahan, D.T., 2006. Fixed metabolic costs for highly variable rates of protein synthesis in sea urchin embryos and larvae. *Journal of Experimental Biology* 209, 158-170.
- Pace, D.A., Manahan, D.T., 2007a. Cost of Protein Synthesis and Energy Allocation During Development of Antarctic Sea Urchin Embryos and Larvae. *The Biological Bulletin* 212, 115-129.
- Pace, D.A., Manahan, D.T., 2007b. Efficiencies and costs of larval growth in different food environments (Asteroidea: *Asterina miniata*). *Journal of Experimental Marine Biology and Ecology* 353, 89-106.

- Pace, D.A., Maxson, R., Manahan, D.T., 2010. Ribosomal Analysis of Rapid Rates of Protein Synthesis in the Antarctic Sea Urchin *Sterechinus neumayeri*. *The Biological Bulletin* 218, 48-60.
- Pan, T.-C.F., Applebaum, S.L., Frieder, C.A., Manahan, D.T., 2018. Biochemical bases of growth variation during development: a study of protein turnover in pedigreed families of bivalve larvae (*Crassostrea gigas*). *The Journal of Experimental Biology* 221, jeb171967.
- Pan, T.-C.F., Applebaum, S.L., Manahan, D.T., 2015. Experimental ocean acidification alters the allocation of metabolic energy. *Proceedings of the National Academy of Sciences* 112, 4696-4701.
- Peth, A., Nathan, J.A., Goldberg, A.L., 2013. The ATP Costs and Time Required to Degrade Ubiquitinated Proteins by the 26 S Proteasome. *Journal of Biological Chemistry* 288, 29215-29222.
- Pfeiffer, B.E., Huber, K.M., 2006. Current advances in local protein synthesis and synaptic plasticity. *Journal of Neuroscience* 26, 7147-7150.
- Raught, B., Gingras, A.-C., Sonenberg, N., 2001. The target of rapamycin (TOR) proteins. *Proceedings of the National Academy of Sciences* 98, 7037-7044.
- Reitzel, A.M., Webb, J., Arellano, S., 2004. Growth, development and condition of *Dendraster excentricus* (Eschscholtz) larvae reared on natural and laboratory diets. *Journal of Plankton Research* 26, 901-908.
- Rendleman, A.J., Pace, D.A., 2018. Physiology of growth in typical and transversus echinopluteus larvae. *Invertebrate Biology* 137, 289-307.
- Rendleman, A.J., Rodriguez, J.A., Ohanian, A., Pace, D.A., 2018. More than morphology: Differences in food ration drive physiological plasticity in echinoid larvae. *Journal of experimental marine biology and ecology* 501, 1-15.
- Romanelli, D., Casati, B., Franzetti, E., Tettamanti, G., 2014. A molecular view of autophagy in Lepidoptera. *BioMed research international* 2014.
- Rumrill, S.S., 1990. Natural mortality of marine invertebrate larvae. *Ophelia* 32, 163-198.
- Schiopu, D., George, S.B., Castell, J., 2006. Ingestion rates and dietary lipids affect growth and fatty acid composition of *Dendraster excentricus* larvae. *Journal of Experimental Marine Biology and Ecology* 328, 47-75.
- Schmidt-Nielsen, K., 1997. *Animal physiology: adaptation and environment*. Cambridge University Press.
- Scott, R.C., Schuldiner, O., Neufeld, T.P., 2004. Role and Regulation of Starvation-Induced Autophagy in the *Drosophila* Fat Body. *Developmental Cell* 7, 167-178.
- Sewell, M.A., Cameron, M.J., McArdle, B.H., 2004. Developmental plasticity in larval development in the echinometrid sea urchin *Evechinus chloroticus* with varying food ration. *Journal of Experimental Marine Biology and Ecology* 309, 219-237.
- Shilling, F.M., Manahan, D.T., 1994. Energy Metabolism and Amino Acid Transport During Early Development of Antarctic and Temperate Echinoderms. *The Biological Bulletin* 187, 398-407.
- Smith, W.B., Starck, S.R., Roberts, R.W., Schuman, E.M., 2005. Dopaminergic stimulation of local protein synthesis enhances surface expression of GluR1 and synaptic transmission in hippocampal neurons. *Neuron* 45, 765-779.
- Soars, N.A., Prowse, T.A.A., Byrne, M., 2009. Overview of phenotypic plasticity in echinoid larvae, *Echinopluteus transversus*; type vs. typical echinoplutei. *Marine Ecology Progress Series* 383, 113-125.
- Sokal, R.R.R., James, F., Sokal, R.R., Rohlf, F.J., 1987. *Introduction to biostatistics*.
- Sokoloff, L., Kaufman, S., 1961. Thyroxine Stimulation of Amino Acid Incorporation into Protein. *Journal of Biological Chemistry* 236, 795-803.
- Strathmann, R.R., 1971. The feeding behavior of planktotrophic echinoderm larvae: Mechanisms, regulation, and rates of suspensionfeeding. *Journal of Experimental Marine Biology and Ecology* 6, 109-160.

- Strathmann, R.R., Fenaux, L., Strathmann, M.F., 1992. Heterochronic developmental plasticity in larval sea urchins and its implications for evolution of nonfeeding larvae. *Evolution*, 972-986.
- Thompson, B., 2006. *Foundations of behavioral statistics: An insight-based approach*. Guilford Press.
- Uller, T., Feiner, N., Radersma, R., Jackson, I.S.C., Rago, A., 2020. Developmental plasticity and evolutionary explanations. *Evolution & Development* 22, 47-55.
- Vedel, A., Rissgard, H., 1993. Filter-feeding in the polychaete *Neris diversicolor*: growth and bioenergetics. *Marine Ecology Progress Series* 100, 145-152.

**Table 1. Statistical analyses for physiological variables in *D. excentricus* larvae reared at low and high food concentrations. Cultures were treated as a random blocking factor.**

| <b>Trait</b>                                                                                                       | <b>Source</b>                 | <b>df</b> | <b>MS</b>            | <b>F</b> | <b>P</b> |
|--------------------------------------------------------------------------------------------------------------------|-------------------------------|-----------|----------------------|----------|----------|
| <b>Protein biomass<br/>(ng protein ind<sup>-1</sup>)<br/>Fig. 2A</b>                                               | Culture                       | 2         | 0.021                | 0.93     | 0.40     |
|                                                                                                                    | Treatment (Low- and High-fed) | 1         | 0.093                | 4.04     | 0.052    |
|                                                                                                                    | DPF                           | 1         | 5.38                 | 238.87   | < 0.001  |
|                                                                                                                    | Interaction (Treatment x DPF) | 1         | 0.11                 | 20.35    | < 0.001  |
|                                                                                                                    | Error                         | 38        | 0.023                |          |          |
| <b>Ingestion rate<br/>(algal cells<br/>day<sup>-1</sup> ind<sup>-1</sup>)<br/>Fig. 2B</b>                          | Culture                       | 2         | 2.35                 | 52.86    | < 0.001  |
|                                                                                                                    | Treatment (Low- and High-fed) | 1         | 6.14                 | 138.19   | < 0.001  |
|                                                                                                                    | DPF                           | 1         | 8.23                 | 185.31   | < 0.001  |
|                                                                                                                    | Interaction (Treatment x DPF) | 1         | 0.095                | 2.14     | 0.146    |
|                                                                                                                    | Error                         | 151       | 0.044                |          |          |
| <b>Respiration rate<br/>(pmol O<sub>2</sub> hr<sup>-1</sup> ind<sup>-1</sup>)<br/>Fig. 2C</b>                      | Culture                       | 2         | 0.34                 | 23.41    | < 0.001  |
|                                                                                                                    | Treatment (Low- and High-fed) | 1         | 0.42                 | 28.59    | < 0.001  |
|                                                                                                                    | DPF                           | 1         | 2.99                 | 203.55   | < 0.001  |
|                                                                                                                    | Interaction (Treatment x DPF) | 1         | 0.14                 | 9.51     | 0.004    |
|                                                                                                                    | Error                         | 32        | 0.015                |          |          |
| <b>Transport rate<br/>(pmol hr<sup>-1</sup> ind<sup>-1</sup>)<br/>Fig. 3A</b>                                      | Culture                       | 2         | 381.23               | 14.75    | < 0.001  |
|                                                                                                                    | Treatment (Low- and High-fed) | 1         | 1.76                 | 0.07     | 0.796    |
|                                                                                                                    | DPF                           | 1         | 3.37x10 <sup>3</sup> | 130.39   | < 0.001  |
|                                                                                                                    | Interaction (Treatment x DPF) | 1         | 557                  | 21.55    | < 0.001  |
|                                                                                                                    | Error                         | 32        | 25.84                |          |          |
| <b>Transport rate<br/>(pmol hr<sup>-1</sup><br/>µg<sup>-1</sup> protein)<br/>Fig. 3B</b>                           | Culture                       | 2         | 1.7x10 <sup>-3</sup> | 2.83     | 0.074    |
|                                                                                                                    | Treatment (Low- and High-fed) | 1         | 2.7x10 <sup>-3</sup> | 4.49     | 0.042    |
|                                                                                                                    | DPF                           | 1         | 2.3x10 <sup>-3</sup> | 3.92     | 0.056    |
|                                                                                                                    | Interaction (Treatment x DPF) | 1         | 5.0x10 <sup>-6</sup> | 0.01     | 0.931    |
|                                                                                                                    | Error                         | 32        | 6.0x10 <sup>-4</sup> |          |          |
| <b>Protein synthesis<br/>rate<br/>(ng protein hr<sup>-1</sup><br/>ind<sup>-1</sup>)<br/>Fig. 4A</b>                | Culture                       | 2         | 0.047                | 0.94     | 0.401    |
|                                                                                                                    | Treatment (Low- and High-fed) | 1         | 0.63                 | 12.61    | 0.001    |
|                                                                                                                    | DPF                           | 1         | 3.83                 | 76.87    | < 0.001  |
|                                                                                                                    | Interaction (Treatment x DPF) | 1         | 0.055                | 1.10     | 0.302    |
|                                                                                                                    | Error                         | 32        | 0.050                |          |          |
| <b>Protein synthesis<br/>rate<br/>(ng protein<br/>synthesized ng<sup>-1</sup><br/>protein biomass)<br/>Fig. 4B</b> | Culture                       | 2         | 0.068                | 0.90     | 0.417    |
|                                                                                                                    | Treatment (Low- and High-fed) | 1         | 0.12                 | 1.59     | 0.218    |
|                                                                                                                    | DPF                           | 1         | 0.44                 | 5.79     | 0.022    |
|                                                                                                                    | Interaction (Treatment x DPF) | 1         | 8.0x10 <sup>-3</sup> | 0.11     | 0.747    |
|                                                                                                                    | Error                         | 32        | 0.075                |          |          |
| <b>Correlative cost of<br/>protein synthesis<br/>[J (mg protein<br/>synthesized)<sup>-1</sup> ng<br/>Fig. 5B</b>   | Culture                       | 2         | 266                  | 1.29     | 0.289    |
|                                                                                                                    | Treatment (Low- and High-fed) | 1         | 1.09x10 <sup>3</sup> | 5.29     | 0.028    |
|                                                                                                                    | Protein synthesized           | 1         | 2.48x10 <sup>4</sup> | 120      | < 0.001  |
|                                                                                                                    | Interaction (Treatment x DPF) | 1         | 445                  | 2.16     | 0.152    |
|                                                                                                                    | Error                         | 32        | 206                  |          |          |

## Figure Legends

1 **Figure 1. Changes in larval morphology and expression of morphological plasticity in**  
2 **low- and high-fed larvae of *D. excentricus*. (A)** Larvae at 7 DPF. Scale bar = 200 $\mu$ m. **(B)**  
3 Postoral arm growth in low- and high-fed larvae. There was no significant treatment effect  
4 (ANOVA,  $F_{1,13} = 0.04$ ,  $P = 0.85$ ) or interaction with larval age (ANOVA,  $F_{1,13} = 1.44$ ,  $P = 0.26$ ),  
5 indicative that PO arm length growth was similar in low- and high-fed larvae. **(C)** Midline body  
6 length growth in low- and high-fed larvae. **(D)** Postoral arm growth as a function of midline body  
7 length. Solid line represents linear regression model for each feeding treatment. Low-fed:  $y =$   
8  $5.34x - 581.0$ ,  $r^2 = 0.84$ ; High-fed:  $y = 2.47x - 159.3$ ,  $r^2 = 0.98$ . There was a significant feeding  
9 treatment effect: ANOVA,  $F_{1,13} = 11.36$ ,  $P = 0.007$ , indicative of low-fed larvae having a longer  
10 postoral arm length for any given midline body length. For all graphs: low-fed = white symbols;  
11 high-fed = black symbols. Data for morphology was from Culture 3.

12 **Figure 2. Physiological parameters and energetic efficiencies of digestion and growth in**  
13 **low- and high-fed larvae of *D. excentricus*. (A)** Changes in protein biomass (plotted on  $\log_{10}$   
14 scale) in prefeeding (gray symbols), low-fed (white symbols), and high-fed (black symbols)  
15 larvae as a function of age (DFP). Symbols are means  $\pm$  SEM ( $n = 3$ ). Regression lines show  
16 the pooled response for low- and high-fed larvae for all three cultures analyzed: Culture 1 =  
17 circles, Culture 2 = squares, Culture 3 = triangles. Inset: relative growth rates for each  
18 treatment. Mean RGR  $\pm$  SEM ( $n = 3$ ). **(B)** Ingestion rates (plotted on a  $\log_{10}$  scale) in low- and  
19 high fed larvae as a function of age. Symbols are means ( $n = 3$ ) and are the same as in panel  
20 A. Regression lines are for all 3 cultures pooled for each feeding treatment. **(C)** Respiration  
21 rates (plotted on a  $\log_{10}$  scale) in prefeeding (gray symbols), low-fed (white symbols), and high-  
22 fed (black symbols) larvae. Symbols represent respiration rate  $\pm$  SEM ( $n = 7$ ). Regression lines  
23 are for all 3 cultures pooled for each feeding treatment (low- and high-fed). Symbols are the  
24 same as in panel A. **(D)** Modeled daily efficiency measurements relating to digestion and growth  
25 in low- and high-fed larvae. AE = assimilation efficiency, GGE = gross growth efficiency, NGE =  
26 net growth efficiency, PGE = protein growth efficiency. All values were determined using  
27 parameters from regression lines in panels A-C. See supplementary information relating to  
28 regression values used for energetic modeling.

29 **Figure 3. Alanine transport rates in low- and high-fed larvae of *D. excentricus*. (A)** Whole-  
30 animal rates of alanine transport as a function of larval age for low-fed (white symbols) and  
31 high-fed (black symbols) larvae for all three cultures analyzed: Culture 1 = circles, Culture 2 =  
32 squares, Culture 3 = triangles. Regression line is for all three cultures for each treatment. **(B)**



1 Protein-specific alanine transport rates for low-fed (white circles) and high-fed (black squares)  
2 larvae. Each value is the average transport rate ( $\pm$  SEM) at each larval age for the 3 replicate  
3 cultures shown in panel (A). Protein values taken from data in Fig. 2A. Inset shows the least  
4 squares means (ANCOVA) of protein-specific transport rate (from Fig. 3B), error bars are SEM.  
5 Statistical analyses for larval and mass-specific transport rates are given in Table 1.

6 **Figure 4. Protein metabolism in low- and high-fed larvae of *D. excentricus*.** (A) Whole-  
7 animal rates of protein synthesis (plotted on a  $\log_{10}$  scale) in prefeeding (gray symbols), low-fed  
8 (white symbols), and high-fed (black symbols) larvae as a function of age (DFP). Regression  
9 lines show the pooled response for low- and high-fed larvae for all three cultures analyzed:  
10 Culture 1 = circles, Culture 2 = squares, Culture 3 = triangles. Each data point is the result of a  
11 6-point kinetic assay, error bar = SE of slope (see Methods for details). (B) Fractional rates of  
12 protein synthesis. Values represent the average for the 3 independent cultures at each larval  
13 age ( $\pm$  SEM). Values slightly offset for visual clarity. Gray triangle = prefeeding, white circles =  
14 low-fed, black squares = high-fed. (C) Modeled rates of protein degradation in low-fed (white  
15 circles) and high-fed (black squares) larvae. Degradation rates were estimated using the  
16 difference between protein synthesized per day (from Fig. 4A) and protein grown per day (from  
17 Fig. 2A). Inset shows the estimated percent of metabolism used for protein degradation during  
18 development. The cost of protein degradation of  $0.14 \text{ kJ gram}^{-1}$  protein was taken Pan et al.,  
19 2018.

20 **Figure 5. Energetic cost of protein synthesis and percent metabolism in low- and high-**  
21 **fed larvae of *D. excentricus*.** (A) Primary data for inhibitor analysis calculating the energetic  
22 cost of protein synthesis. Rates of protein synthesis (PS, right y axis) and metabolism ( $\text{O}_2$ , left y  
23 axis) for the developmental stages and feeding treatments used to calculate cost. Metabolic  
24 rates were converted to energetic units using an oxyenthalpic value of 484 Joules per mole  $\text{O}_2$   
25 consumed. Total height of white bars are rates of protein synthesis and metabolism without  
26 protein synthesis inhibitor, anisomycin. Black bars are respective rates when in the presence of  
27 anisomycin. Inset shows the average cost for prefeeding stages, low-fed, and high-fed larvae  
28 derived from primary data. Differences between stage/treatments were not significant (ANOVA:  
29  $\text{df} = 1, 5, P = 0.62$ ) and the average cost was  $4.47 \text{ J (mg protein)}^{-1} \pm 0.63$  ( $N=6, \pm$  SE). (B)  
30 Data for calculating the correlative cost of protein synthesis. Metabolic rates were plotted as a  
31 function of protein synthesis rates throughout development (no inhibitor was used for this  
32 approach). The solid regression line represents pooled relationship for low- and high-fed  
33 treatments: low-fed (white) and high-fed (black). Symbols represent the 3 different cultures

1 followed in this study: Culture 1 = circles, Culture 2 = squares, Culture 3 = triangles. The slope  
2 of the relationship represents the cost of protein synthesis of  $5.34 \text{ J (mg protein)}^{-1} \pm 0.51$  (N =  
3 33,  $\pm$  SE). The dashed lines above and below the solid regression line represent the high-fed  
4 (above) and low-fed (below) correlative costs. As described in text, while the elevation of these  
5 correlations were different, the slope values were similar to each other.

6 **Figure 6. Protein depositional efficiency and percent metabolism of protein synthesis. (A)**  
7 Modeled changes in Protein Depositional Efficiency (PDE). PDE is the percent of synthesized  
8 protein (taken from Fig. 4A) that is retained as larval biomass (taken from Fig. 2A). White circles  
9 = low-fed, black squares = high-fed. **(B)** Percent of metabolism used to fuel measured rates of  
10 protein synthesis. Protein synthesis rates (Fig. 4A) were multiplied by the grand average of the  
11 cost of protein synthesis ( $4.91 \text{ J mg}^{-1} \text{ protein}$ ) to calculate the energy used to sustain protein  
12 synthesis rates. These values were then divided by the total metabolic rate (Fig. 2C) to return  
13 the percent of metabolic rate used to drive protein synthesis. Percent metabolism for protein  
14 synthesis was similar between low- and high-fed larvae (ANOVA,  $F_{1,32} = 0.59$ ,  $P = 0.45$ ).

## Figures – Protein metabolism and physiological plasticity:

### Figure 1

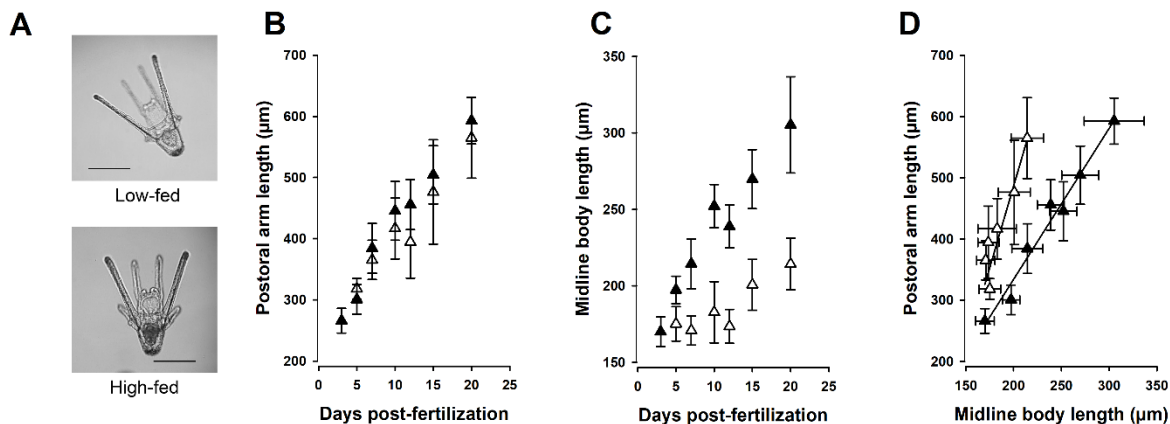

**Figure 1. Changes in larval morphology and expression of morphological plasticity in low- and high-fed larvae of *D. excentricus*.** (A) Larvae at 7 DPF. Scale bar = 200 $\mu\text{m}$ . (B) Postoral arm growth in low- and high-fed larvae. There was no significant treatment effect (ANOVA,  $F_{1,13} = 0.04$ ,  $P = 0.85$ ) or interaction with larval age (ANOVA,  $F_{1,13} = 1.44$ ,  $P = 0.26$ ), indicative that PO arm length growth was similar in low- and high-fed larvae. (C) Midline body length growth in low- and high-fed larvae. (D) Postoral arm growth as a function of midline body length. Solid line represents linear regression model for each feeding treatment. Low-fed:  $y = 5.34x - 581.0$ ,  $r^2 = 0.84$ ; High-fed:  $y = 2.47x - 159.3$ ,  $r^2 = 0.98$ . There was a significant feeding treatment effect: ANOVA,  $F_{1,13} = 11.36$ ,  $P = 0.007$ , indicative of low-fed larvae having a longer postoral arm length for any given midline body length. For all graphs: low-fed = white symbols; high-fed = black symbols. Data for morphology was from Culture 3.

## Figure 2

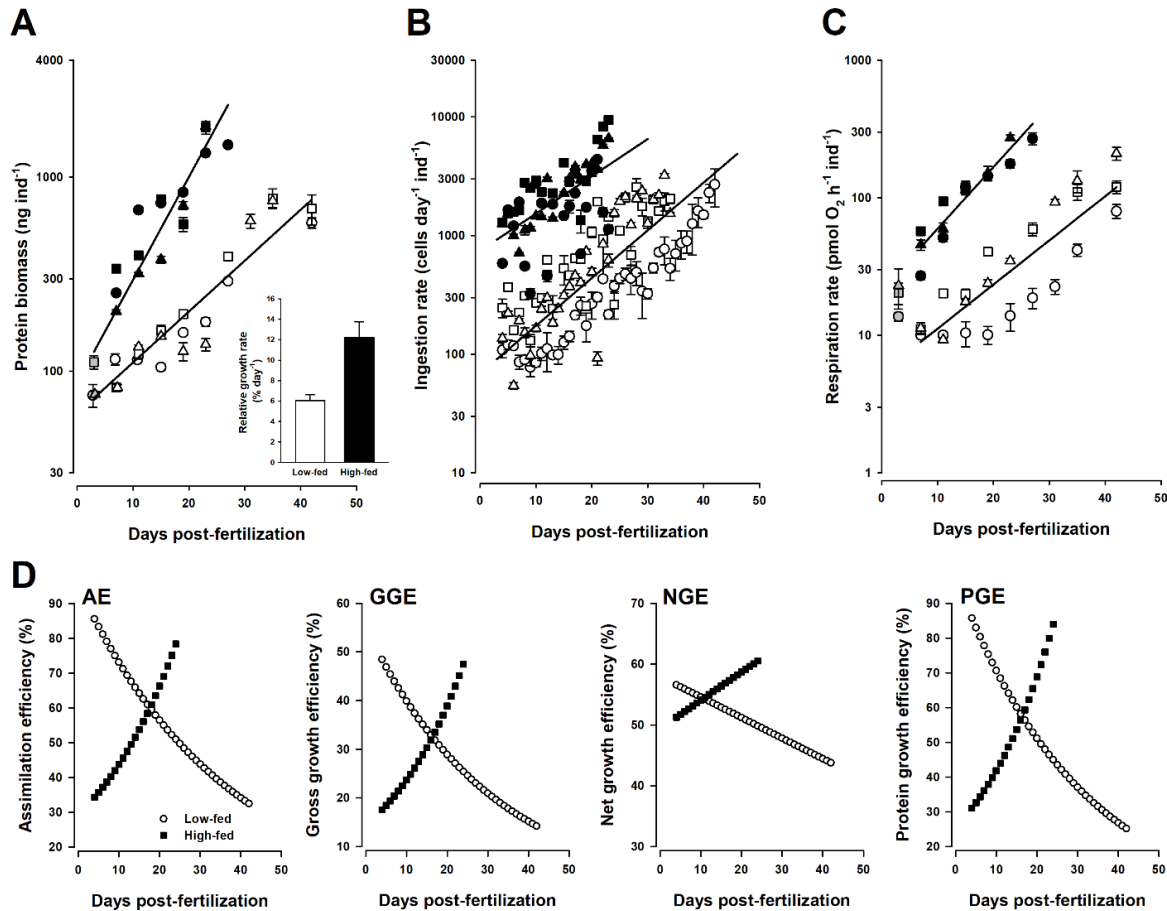

**Figure 2. Physiological parameters and energetic efficiencies of digestion and growth in low- and high-fed larvae of *D. excentricus*.** (A) Changes in protein biomass (plotted on log<sub>10</sub> scale) in prefeeding (gray symbols), low-fed (white symbols), and high-fed (black symbols) larvae as a function of age (DFP). Symbols are means ± SEM (n = 3). Regression lines show the pooled response for low- and high-fed larvae for all three cultures analyzed: Culture 1 = circles, Culture 2 = squares, Culture 3 = triangles. Inset: relative growth rates for each treatment. Mean RGR ± SEM (n = 3). (B) Ingestion rates (plotted on a log<sub>10</sub> scale) in low- and high fed larvae as a function of age. Symbols are means (n = 3) and are the same as in panel A. Regression lines are for all 3 cultures pooled for each feeding treatment. (C) Respiration rates (plotted on a log<sub>10</sub> scale) in prefeeding (gray symbols), low-fed (white symbols), and high-fed (black symbols) larvae. Symbols represent respiration rate ± SEM (n = 7). Regression lines are for all 3 cultures pooled for each feeding treatment (low- and high-fed). Symbols are the same as in panel A. (D) Modeled daily efficiency measurements relating to digestion and growth in low- and high-fed larvae. AE = assimilation efficiency, GGE = gross growth efficiency, NGE = net growth efficiency, PGE = protein growth efficiency. All values were determined using parameters from regression lines in panels A-C. See supplementary information relating to regression values used for energetic modeling.

## Figure 3

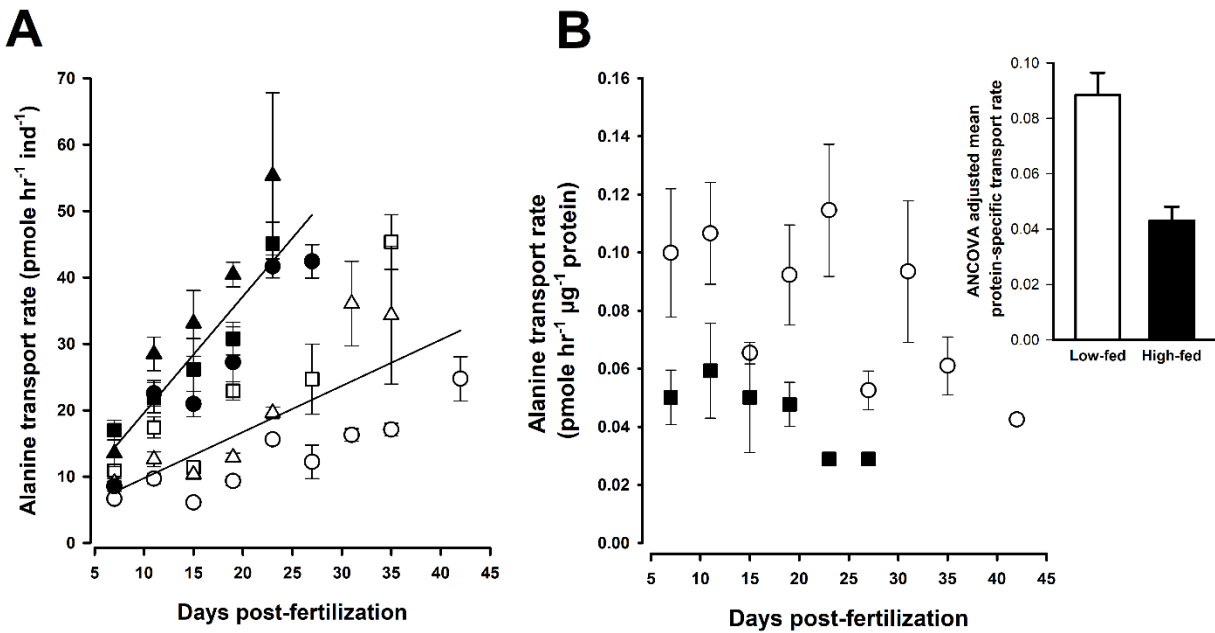

**Figure 3. Alanine transport rates in low- and high-fed larvae of *D. excentricus*.** (A) Whole-animal rates of alanine transport as a function of larval age for low-fed (white symbols) and high-fed (black symbols) larvae for all three cultures analyzed: Culture 1 = circles, Culture 2 = squares, Culture 3 = triangles. Regression line is for all three cultures for each treatment. (B) Protein-specific alanine transport rates for low-fed (white circles) and high-fed (black squares) larvae. Each value is the average transport rate ( $\pm$  SEM) at each larval age for the 3 replicate cultures shown in panel (A). Protein values taken from data in Fig. 2A. Inset shows the least squares means (ANCOVA) of protein-specific transport rate (from Fig. 3B), error bars are SEM. Statistical analyses for larval and mass-specific transport rates are given in Table 1.

## Figure 4

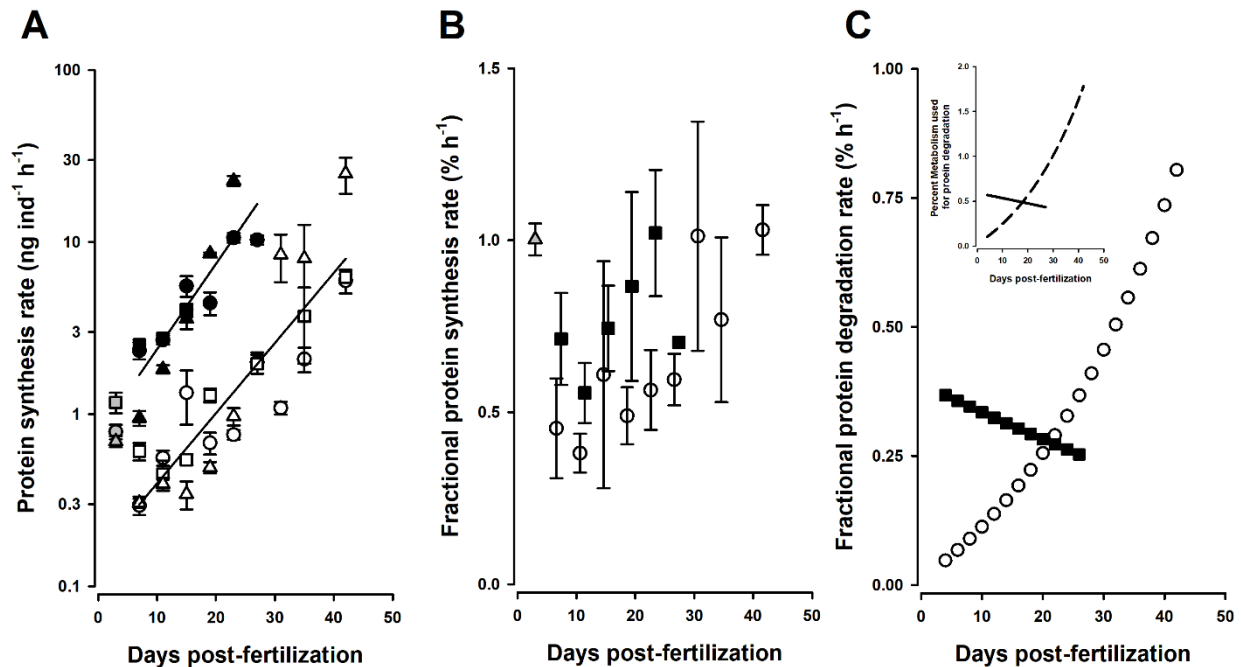

**Figure 4. Protein metabolism in low- and high-fed larvae of *D. excentricus*.** (A) Whole-animal rates of protein synthesis (plotted on a log<sub>10</sub> scale) in prefeeding (gray symbols), low-fed (white symbols), and high-fed (black symbols) larvae as a function of age (DFP). Regression lines show the pooled response for low- and high-fed larvae for all three cultures analyzed: Culture 1 = circles, Culture 2 = squares, Culture 3 = triangles. Each data point is the result of a 6-point kinetic assay, error bar = SE of slope (see Methods for details). (B) Fractional rates of protein synthesis. Values represent the average for the 3 independent cultures at each larval age (+/- SEM). Values slightly offset for visual clarity. Gray triangle = prefeeding, white circles = low-fed, black squares = high-fed. (C) Modeled rates of protein degradation in low-fed (white circles) and high-fed (black squares) larvae. Degradation rates were estimated using the difference between protein synthesized per day (from Fig. 4A) and protein grown per day (from Fig. 2A). Inset shows the estimated percent of metabolism used for protein degradation during development. The cost of protein degradation of 0.14 kJ gram<sup>-1</sup> protein was taken Pan et al., 2018.

## Figure 5

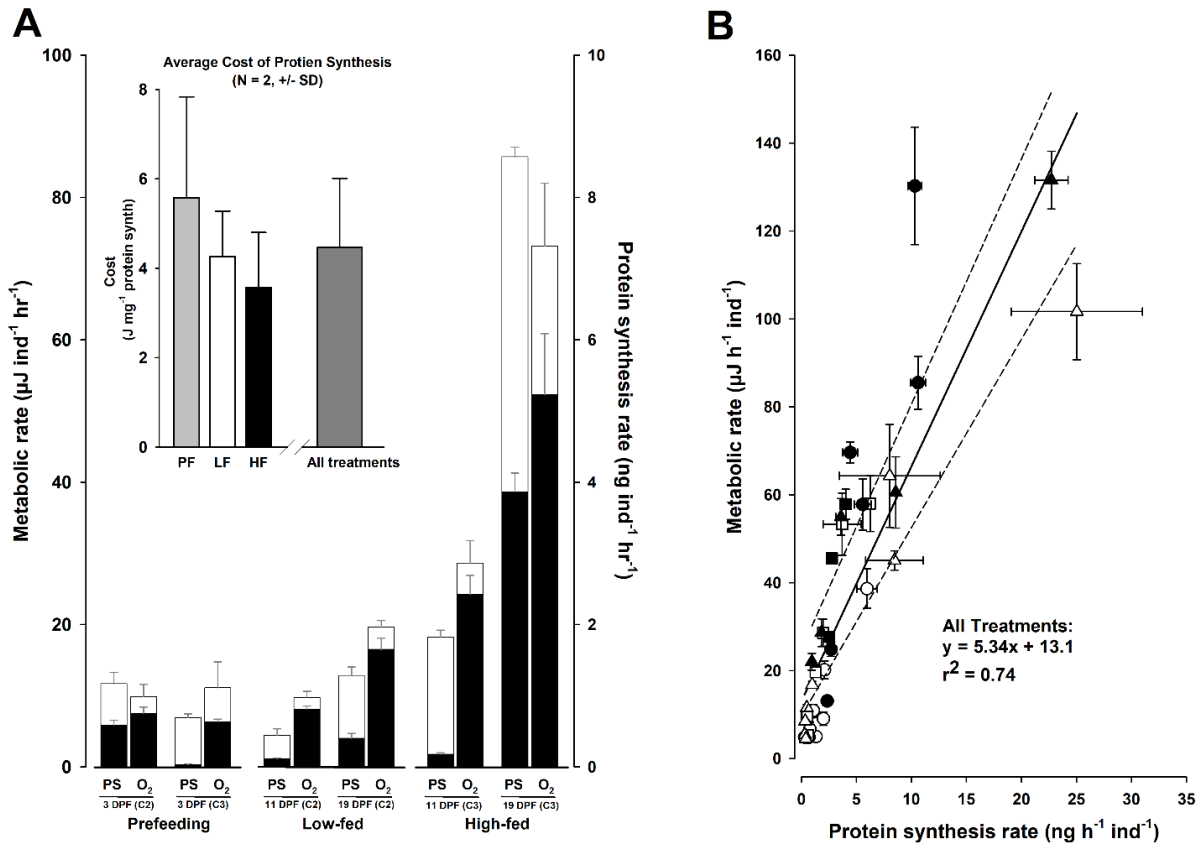

**Figure 5. Energetic cost of protein synthesis and percent metabolism in low- and high-fed larvae of *D. excentricus*.** (A) Primary data for inhibitor analysis calculating the energetic cost of protein synthesis. Rates of protein synthesis (PS, right y axis) and metabolism (O<sub>2</sub>, left y axis) for the developmental stages and feeding treatments used to calculate cost. Metabolic rates were converted to energetic units using an oxyenthalpic value of 484 Joules per mole O<sub>2</sub> consumed. Total height of white bars are rates of protein synthesis and metabolism without protein synthesis inhibitor, anisomycin. Black bars are respective rates when in the presence of anisomycin. Inset shows the average cost for prefeeding stages, low-fed, and high-fed larvae derived from primary data. Differences between stage/treatments were not significant (ANOVA: df = 1, 5, P = 0.62) and the average cost was 4.47 J (mg protein)<sup>-1</sup> +/- 0.63 (N=6, +/- SE). (B) Data for calculating the correlative cost of protein synthesis. Metabolic rates were plotted as a function of protein synthesis rates throughout development (no inhibitor was used for this approach). The solid regression line represents pooled relationship for low- and high-fed treatments: low-fed (white) and high-fed (black). Symbols represent the 3 different cultures followed in this study: Culture 1 = circles, Culture 2 = squares, Culture 3 = triangles. The slope of the relationship represents the cost of protein synthesis of 5.34 J (mg protein)<sup>-1</sup> +/- 0.51 (N = 33, +/- SE). The dashed lines above and below the solid regression line represent the high-fed (above) and low-fed (below) correlative costs. As described in text, while the elevation of these correlations were different, the slope values were similar to each other.

## Figure 6

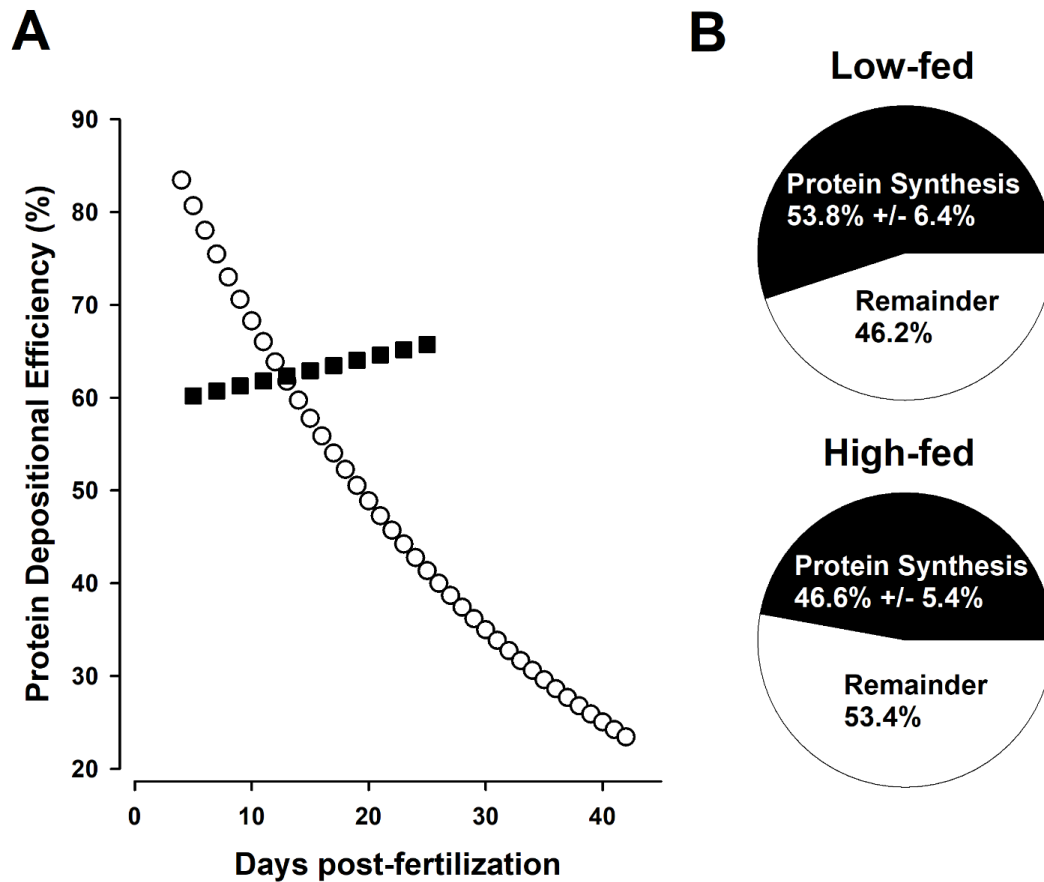

**Figure 6. Protein depositional efficiency and percent metabolism of protein synthesis. (A)** Modeled changes in Protein Depositional Efficiency (PDE). PDE is the percent of synthesized protein (taken from Fig. 4A) that is retained as larval biomass (taken from Fig. 2A). White circles = low-fed, black squares = high-fed. **(B)** Percent of metabolism used to fuel measured rates of protein synthesis. Protein synthesis rates (Fig. 4A) were multiplied by the grand average of the cost of protein synthesis ( $4.91 \text{ J mg}^{-1}$  protein) to calculate the energy used to sustain protein synthesis rates. These values were then divided by the total metabolic rate (Fig. 2C) to return the percent of metabolic rate used to drive protein synthesis. Percent metabolism for protein synthesis was similar between low- and high-fed larvae (ANOVA,  $F_{1,32} = 0.59$ ,  $P = 0.45$ ).
